# Supplementary material for: Sensitive and selective ratiometric fluorescent detection of monosaccharides in aqueous solutions at physiological pH using self-assembled peptides with different aromatic side chains
Source: Royal Society of Chemistry journal article supplement (doi:10.1039/c6nj03830a), 2017-01-01
Supplement: c6nj03830a1.pdf [file c6nj03830a1.pdf]

## Electronic Supplementary Information

### Sensitive and selective ratiometric fluorescent detection of monosaccharides in aqueous solutions at physiological pH using self-assembled peptides with different aromatic side chains

Lok Nath Neupane, Pramod Kumar Mehta and Keun-Hyeung Lee\*

Bioorganic Chemistry Laboratory, Center for Design and Applications of Molecular Catalysts, Department of Chemistry and Chemical Engineering, Inha University, Incheon 402-751, South Korea

E-mail: leekh@inha.ac.kr

#### Contents:

|                                                    |     |
|----------------------------------------------------|-----|
| <b>Scheme S1.</b> Synthesis scheme                 | S3  |
| <b>Figure S1.</b> HPLC Chromatogram of <b>1</b>    | S4  |
| <b>Figure S2.</b> ESI-mass spectrum of <b>1</b>    | S5  |
| <b>Figure S3.</b> $^1\text{H}$ NMR of <b>1</b>     | S6  |
| <b>Figure S4.</b> $^{13}\text{C}$ NMR of <b>1</b>  | S7  |
| <b>Figure S5.</b> Elemental analysis of <b>1</b>   | S8  |
| <b>Figure S6.</b> HPLC Chromatogram of <b>2</b>    | S9  |
| <b>Figure S7.</b> ESI-mass spectrum of <b>2</b>    | S10 |
| <b>Figure S8.</b> $^1\text{H}$ NMR of <b>2</b>     | S11 |
| <b>Figure S9.</b> $^{13}\text{C}$ NMR of <b>2</b>  | S12 |
| <b>Figure S10.</b> Elemental analysis of <b>2</b>  | S13 |
| <b>Figure S11.</b> HPLC Chromatogram of <b>3</b>   | S14 |
| <b>Figure S12.</b> ESI-mass spectrum of <b>3</b>   | S15 |
| <b>Figure S13.</b> $^1\text{H}$ NMR of <b>3</b>    | S16 |
| <b>Figure S14.</b> $^{13}\text{C}$ NMR of <b>3</b> | S17 |
| <b>Figure S15.</b> Elemental analysis of <b>3</b>  | S18 |
| <b>Figure S16.</b> HPLC Chromatogram of <b>4</b>   | S19 |
| <b>Figure S17.</b> ESI-mass spectrum of <b>4</b>   | S20 |
| <b>Figure S18.</b> $^1\text{H}$ NMR of <b>4</b>    | S21 |

|                                                                                                                                                   |     |
|---------------------------------------------------------------------------------------------------------------------------------------------------|-----|
| <b>Figure S19.</b> $^{13}\text{C}$ NMR of <b>4</b>                                                                                                | S22 |
| <b>Figure S20.</b> Elemental analysis of <b>4</b>                                                                                                 | S23 |
| <b>Figure S21.</b> Fluorescence emission spectra of <b>3</b> and <b>4</b> in different percentage of DMSO                                         | S24 |
| <b>Figure S22.</b> Fluorescence spectra and intensity correlation function of <b>1-4</b> for particle size analysis                               | S25 |
| <b>Figure S23.</b> UV-vis absorbance spectra of <b>1-4</b> in different percentage of DMSO                                                        | S26 |
| <b>Figure S24.</b> Fluorescence spectra of <b>1</b> in the presence of D-glucose and D-galactose                                                  | S27 |
| <b>Figure S25.</b> Fluorescence emission spectra of <b>2</b> in the presence of D-glucose and D-galactose                                         | S28 |
| <b>Figure S26.</b> Fluorescence emission spectra of <b>3</b> in the presence of D-glucose and D-galactose                                         | S29 |
| <b>Figure S27.</b> Fluorescence emission spectra of <b>4</b> in the presence of D-glucose and D-galactose                                         | S30 |
| <b>Figure S28.</b> UV-visible absorption spectra of <b>1-4</b> in the presence of D-fructose                                                      | S31 |
| <b>Figure S29.</b> Fluorescence spectra and intensity correlation function of <b>1-4</b> in the presence of D-Fructose for particle size analysis | S32 |
| <b>Figure S30.</b> Fluorescence spectra of <b>2</b> in the presence of pinanediol                                                                 | S33 |
| <b>Figure S31.</b> UV-visible absorption spectra of <b>1-3</b> in the presence of pinanediol                                                      | S34 |
| <b>Figure S32.</b> Fluorescence spectra and UV-visible absorption spectra of <b>4</b> in the presence of pinanediol                               | S35 |
| <b>Figure S33.</b> Fluorescence spectra and intensity correlation function of <b>1-4</b> in the presence of pinanediol                            | S36 |
| <b>Figure S34.</b> ESI mass of <b>1</b> in the presence of D-fructose                                                                             | S37 |
| <b>Figure S35.</b> ESI mass of <b>2</b> in the presence of D-fructose                                                                             | S38 |
| <b>Figure S36.</b> Fitting curve of <b>1-4</b> in the presence of monosaccharides                                                                 | S39 |
| <b>Figure S37.</b> Fitting curve of <b>1-4</b> in the presence of pinanediol                                                                      | S40 |
| <b>Figure S38.</b> Linear intensity ratio change of <b>1-4</b> in the presence of D-Fructose                                                      | S41 |

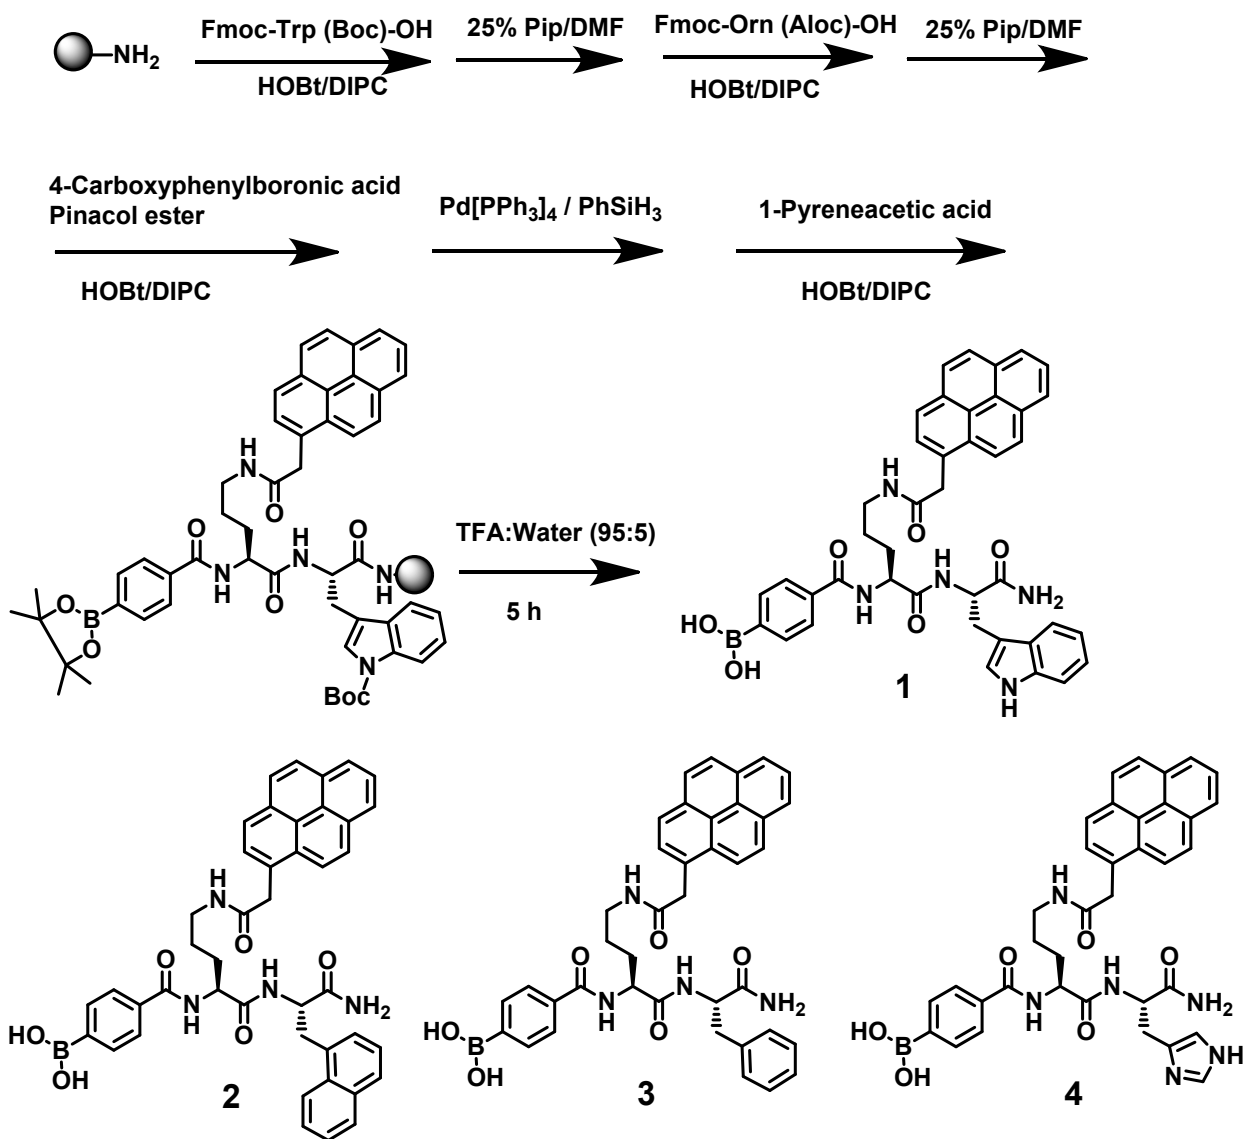

Scheme S1. Synthesis scheme of 1–4.

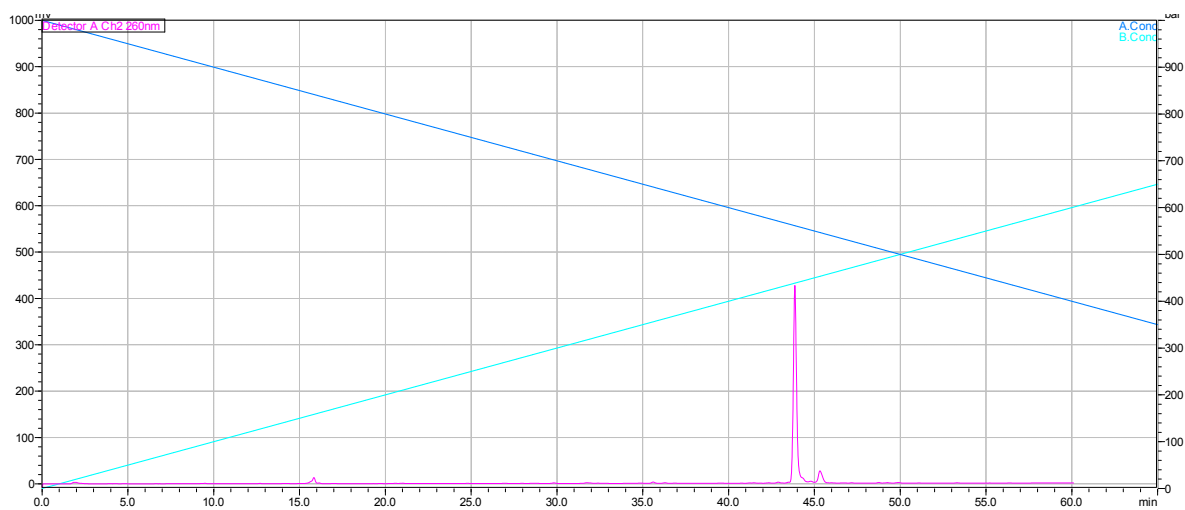

**Figure S1.** HPLC chromatogram of **1**.

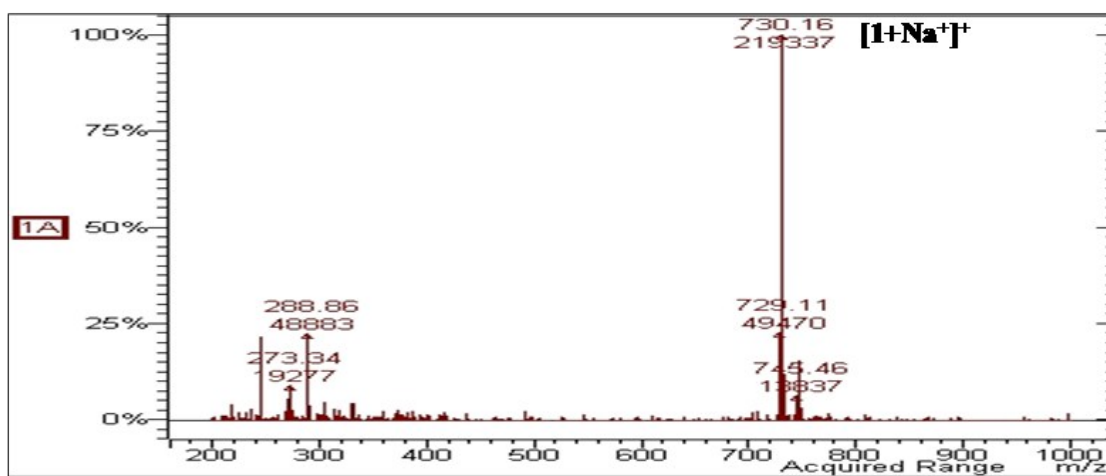

**Figure S2.** ESI-Mass spectrum of **1**.

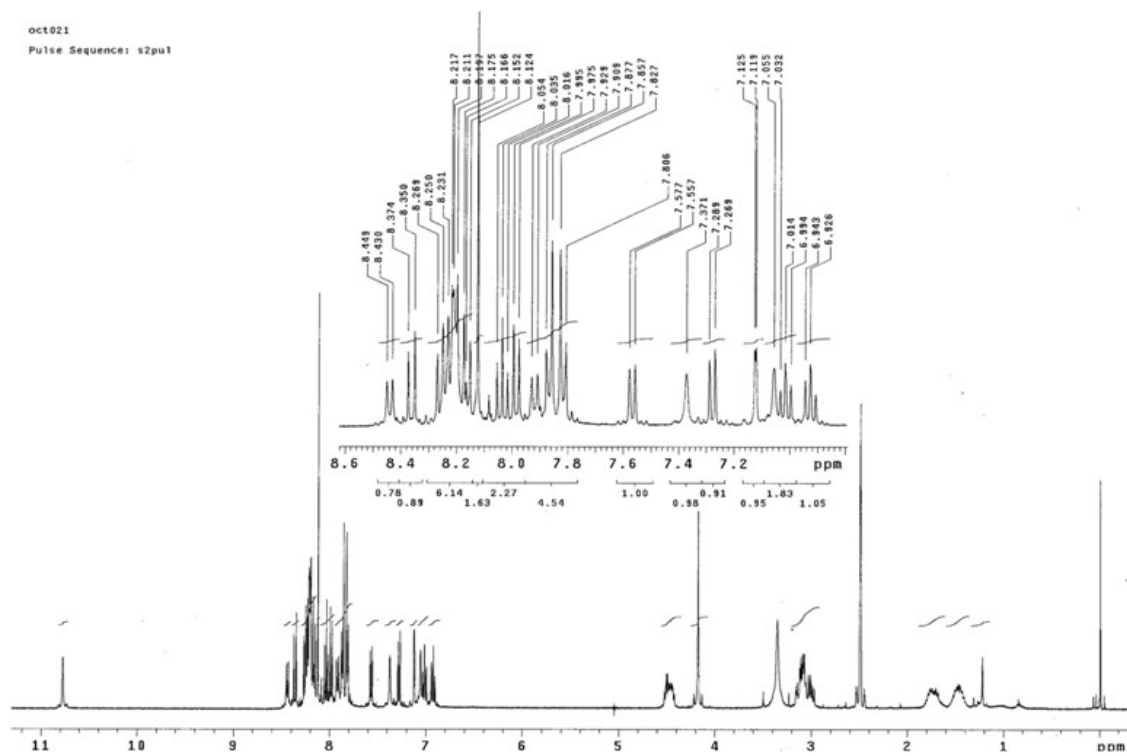

Figure S3.  $^1\text{H}$  NMR of 1.

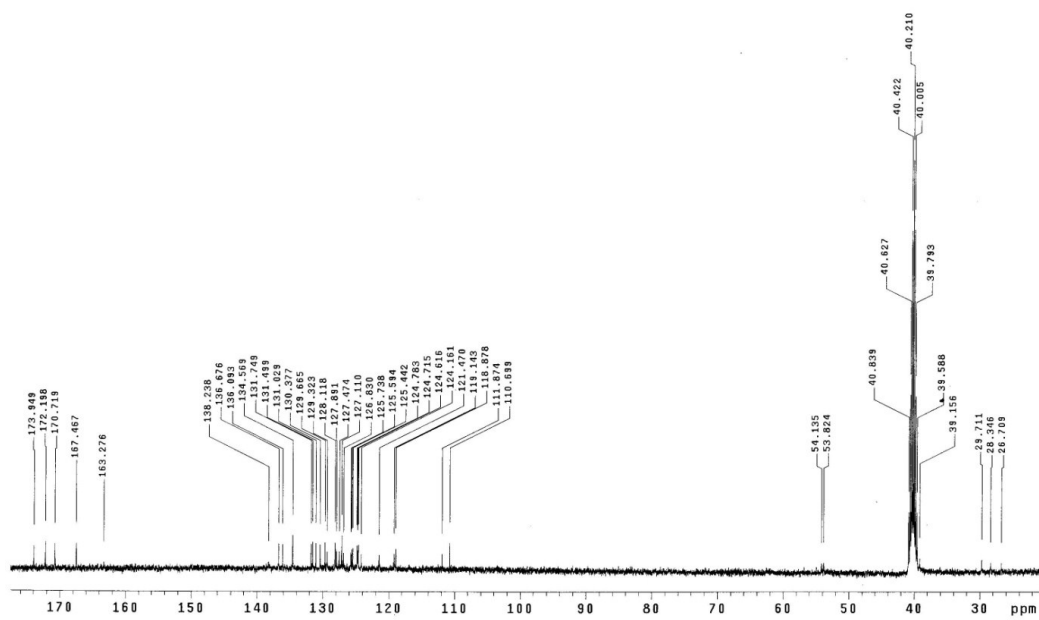

Figure S4.  $^{13}\text{C}$  NMR of **1**.

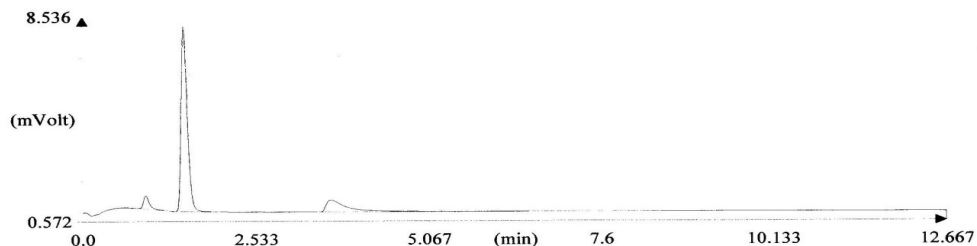

Operator ID: ThermoFinnigan  
 Company name: C:\Program Files\Thermo Electron\Eager 300 for EA1112\원소분석기2\2012\chns\20130111.  
 Method filename: NCHS  
 Method name: 2013-01-10 16:56  
 Analysed: 2013-01-14 14:53  
 Printed:  
 Elemental Analyser method:  
 Sampler method:  
 Sample ID: BOPW (# 16)  
 Analysis type: UnkNown  
 Chromatogram filename: S192.dat  
 Calibration method: K Factors  
 Sample weight: .141  
 Protein factor: 6.25

| Element Name | Ret. Time | Area | BC        | Area ratio | K f:  |
|--------------|-----------|------|-----------|------------|-------|
| Nitrogen     | 10.7560   | 55   | 30620 RS  | 14.851270  | .2011 |
| Carbon       | 66.0790   | 88   | 454739 RS | 1.000000   | .4810 |
| Hydrogen     | 5.1169    | 218  | 111096 RS | 4.093203   | .1467 |
| Totals       | 81.9519   |      | 596454    |            |       |

Figure S5. Elemental analysis of 1.



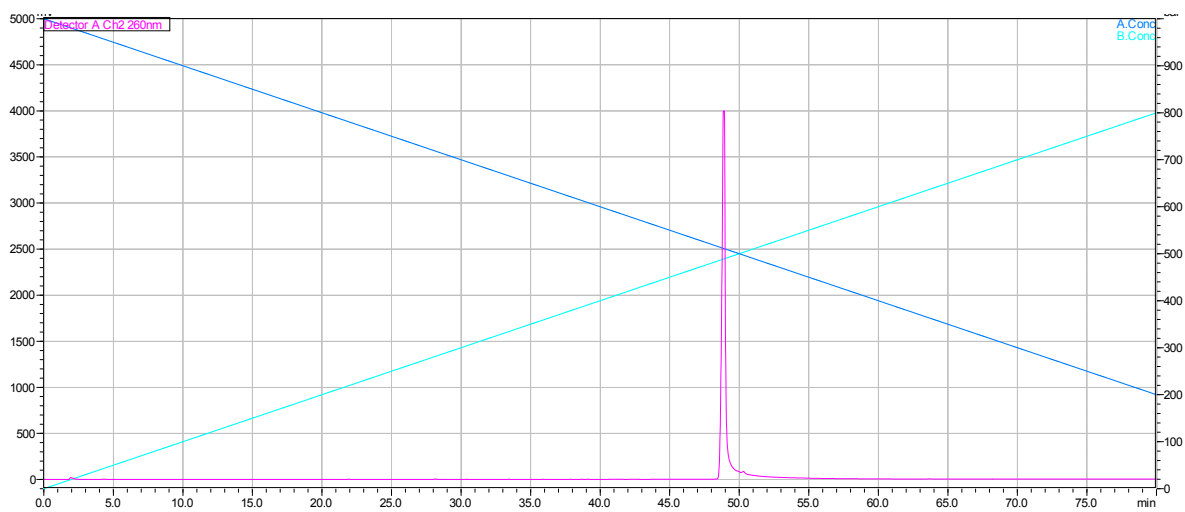

**Figure S6.** HPLC Chromatogram of **2**.

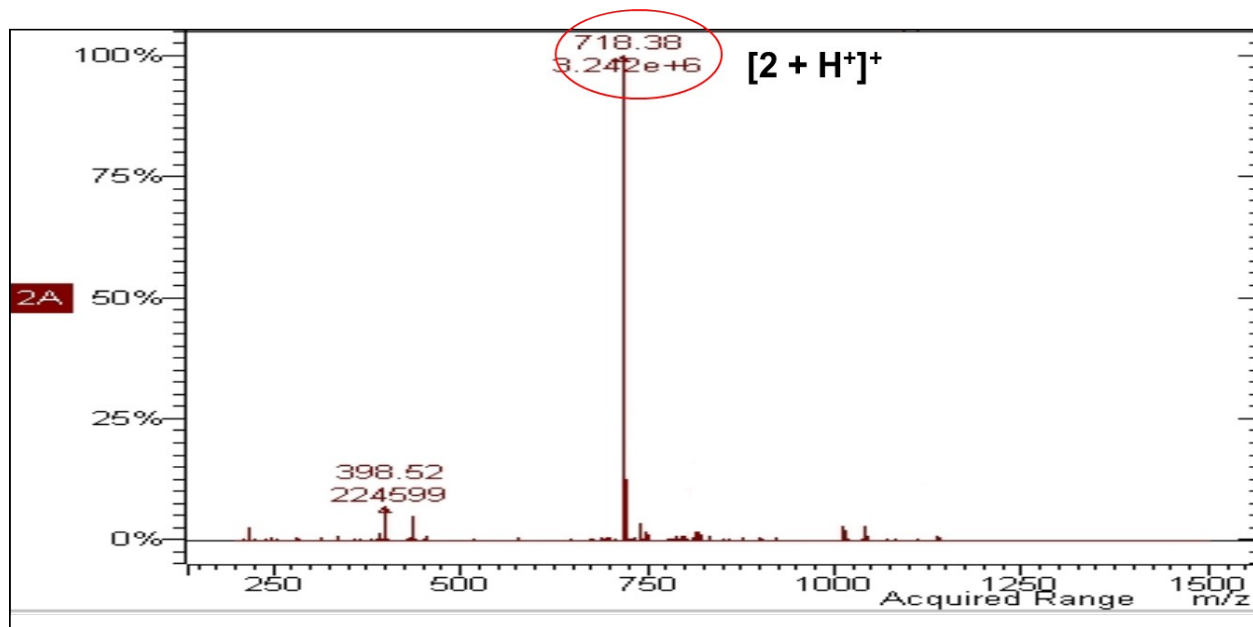

**Figure S7.** ESI-Mass spectrum of **2**.

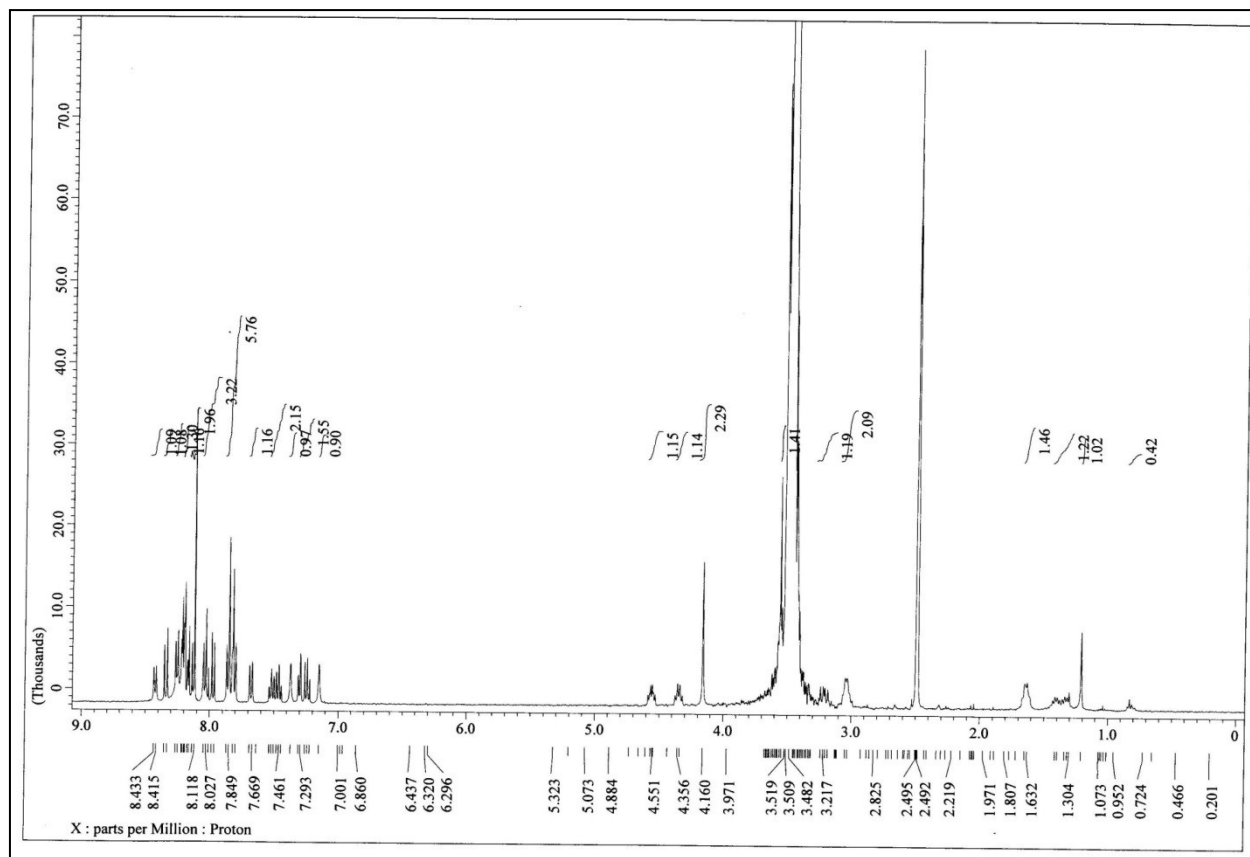

Figure S8.  $^1\text{H}$  NMR of 2.

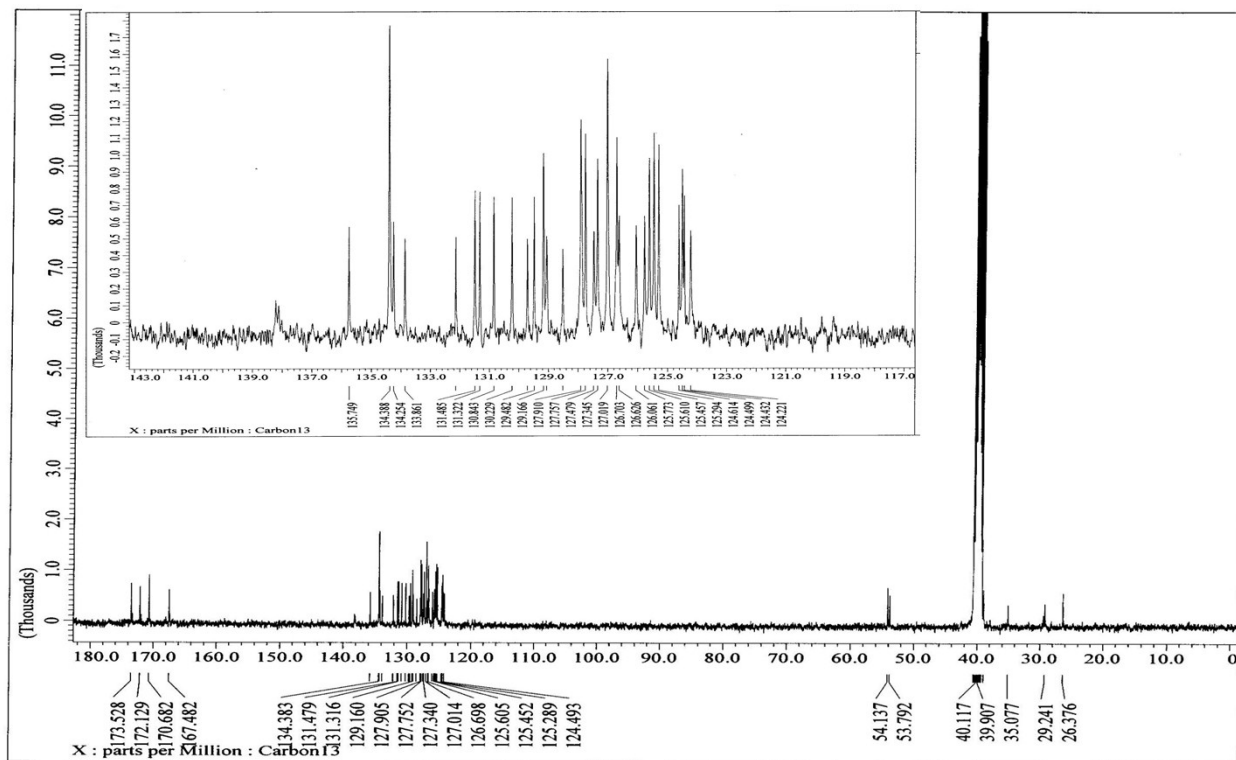

Figure S9. <sup>13</sup>C NMR of 2.

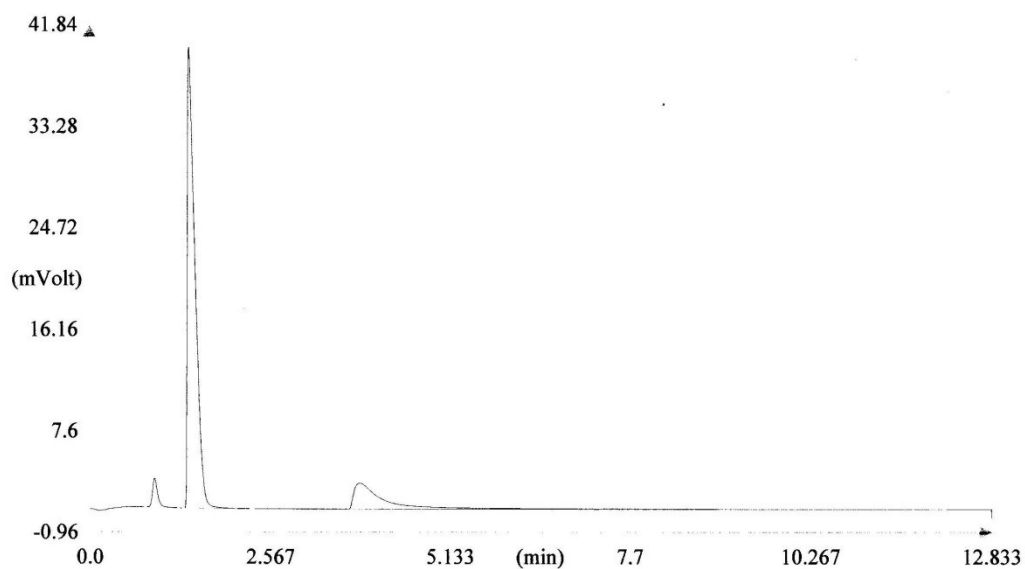

Operator ID:  
 Company name: ThermoFinnigan  
 Method filename: E:\Eager for FLASH\NHA\NCHS\N C H S system 151021.mth  
 Method name: NCHS  
 Analysed: 2015-10-29 15:30  
 Printed: 2015-10-30 13:44  
 Elemental Analyser method:  
 Sampler method:  
 Sample ID: BOPNaI (# 22)  
 Analysis type: UnkNown  
 Chromatogram filename: Q133.dat  
 Calibration method: K Factors  
 Sample weight: .85  
 Protein factor: 6.25

| Element Name | Ret. Time | Area    | BC | Area ratio |
|--------------|-----------|---------|----|------------|
| Nitrogen     | 7.3703    | 125076  | RS | 23.3957    |
| Carbon       | 70.6648   | 2926244 | RS | 1.0000     |
| Hydrogen     | 5.5180    | 685209  | RS | 4.2705     |
| Totals       | 83.5531   | 3736529 |    |            |

**Figure S10.** Elemental analysis of 2.

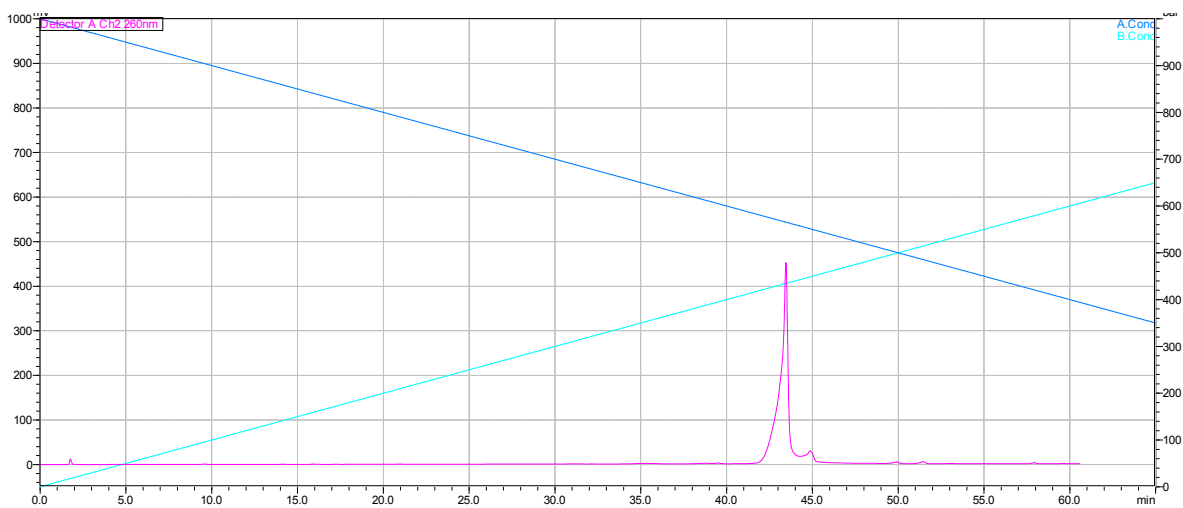

**Figure S11.** HPLC Chromatogram of **3**.

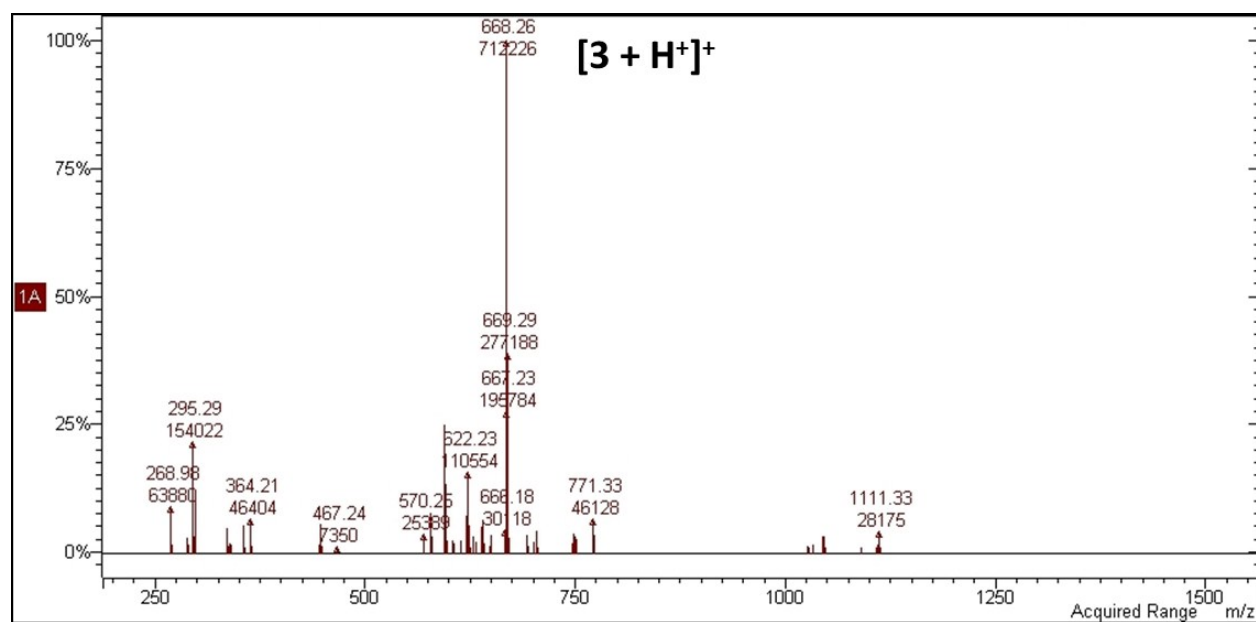

Figure S12. ESI-Mass spectrum of 3.

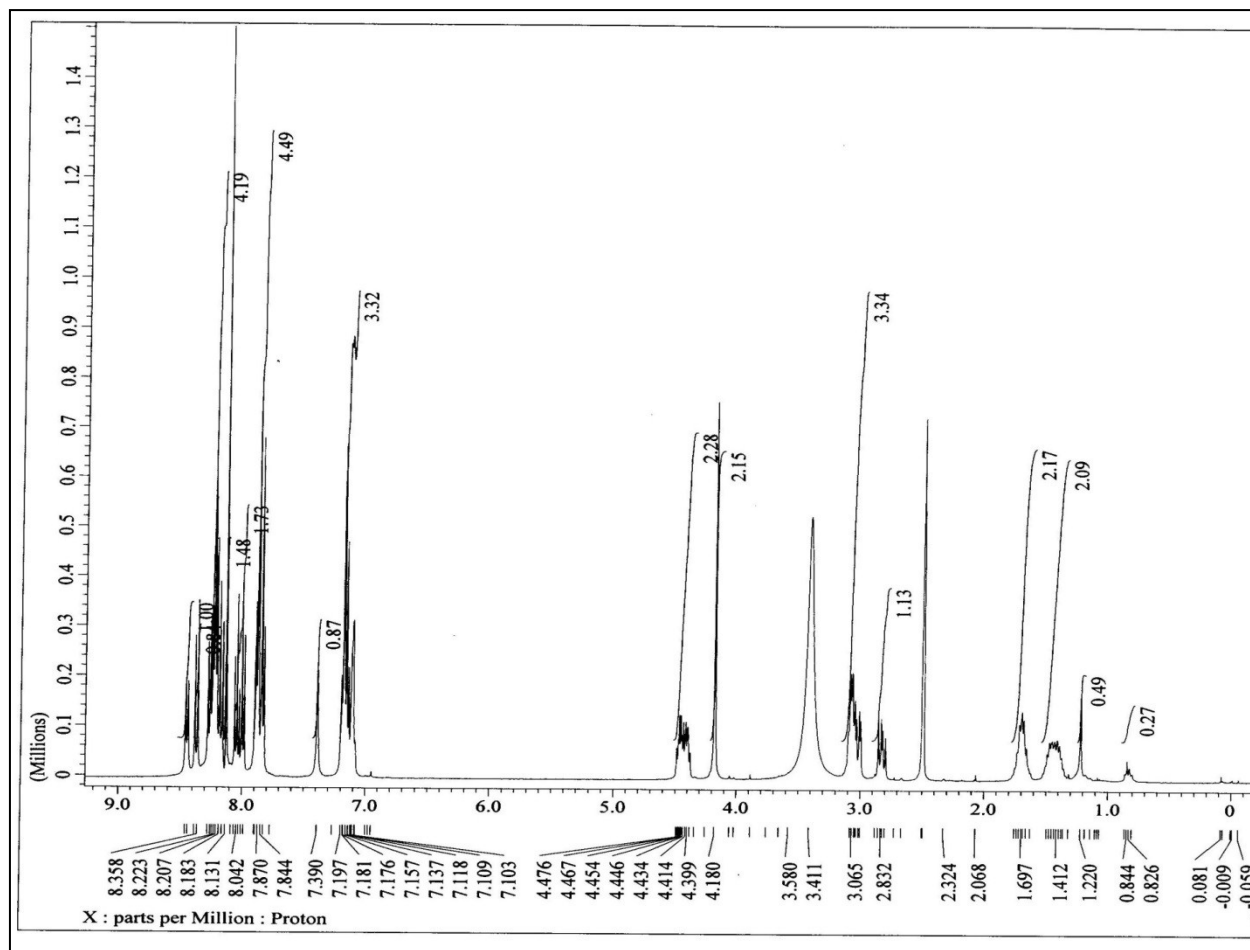

Figure S13.  $^1\text{H}$  NMR of 3.



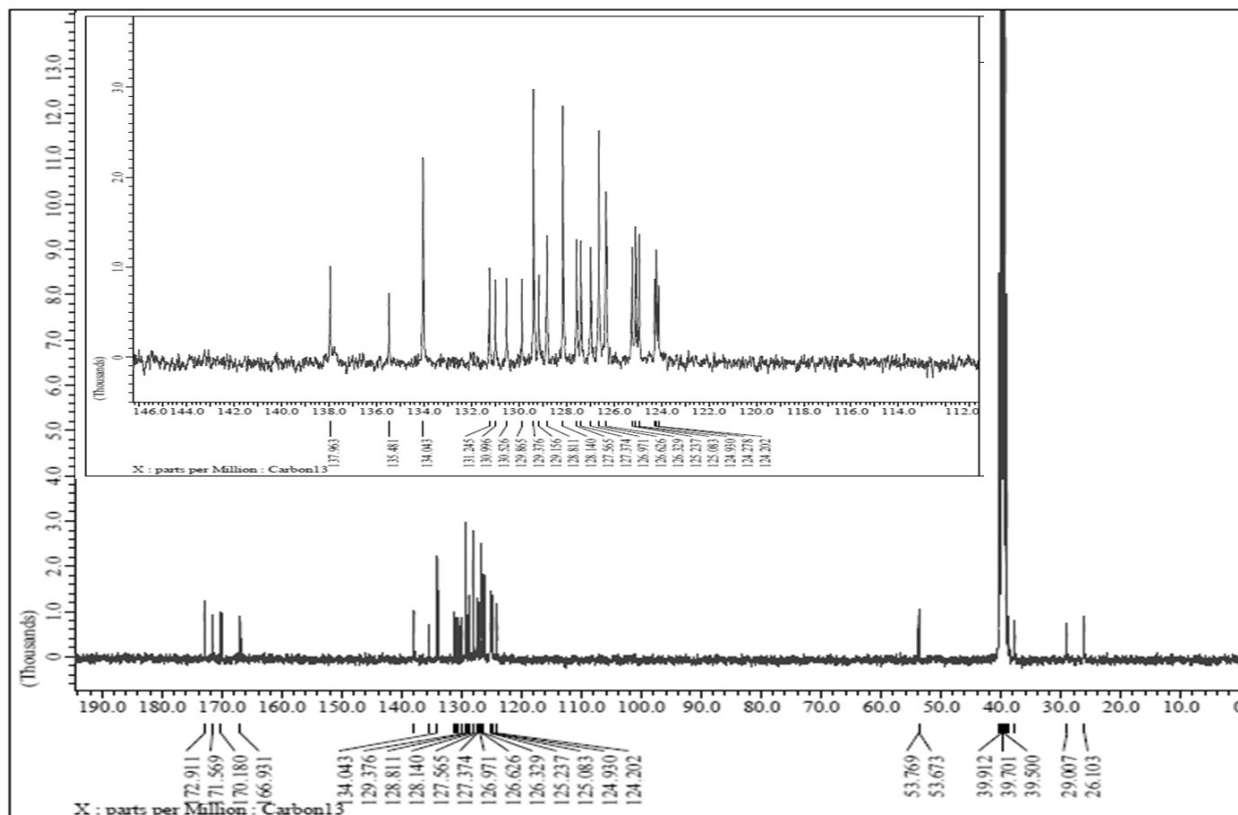

Figure S14.  $^{13}\text{C}$  NMR of 3.

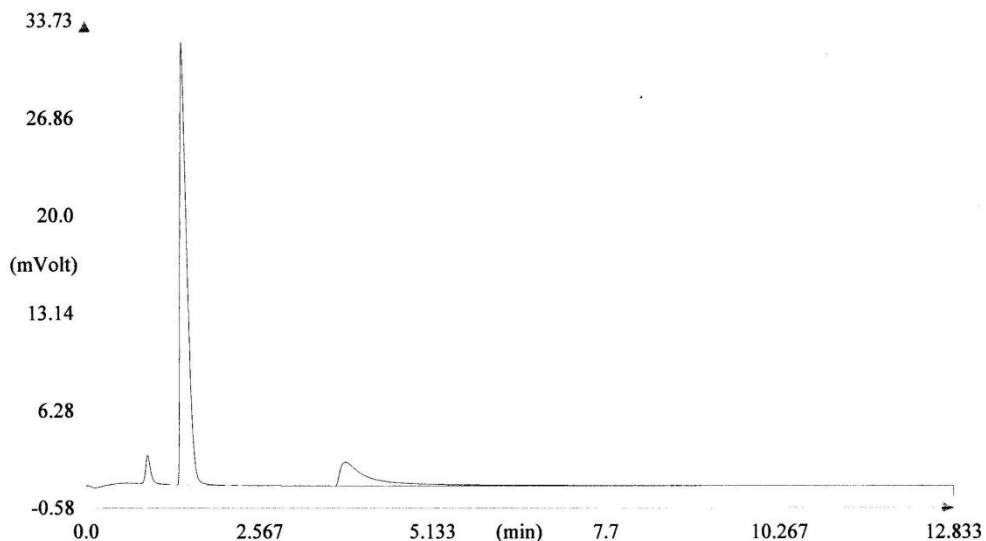

Operator ID:  
 Company name: ThermoFinnigan  
 Method filename: E:\Eager for FLASH\NHA\NCHS\N C H S system 151021.mth  
 Method name: NCHS  
 Analysed: 2015-10-29 15:43  
 Printed: 2015-10-30 13:44  
 Elemental Analyser method:  
 Sampler method:  
 Sample ID: BOPF (# 23)  
 Analysis type: UnkNown  
 Chromatogram filename: Q134.dat  
 Calibration method: K Factors  
 Sample weight: .665  
 Protein factor: 6.25

| Element Name | Ret. Time | Area | BC         | Area ratio |
|--------------|-----------|------|------------|------------|
| Nitrogen     | 7.8835    | 55   | 105239 RS  | 20.9970    |
| Carbon       | 68.1799   | 85   | 2209710 RS | 1.0000     |
| Hydrogen     | 5.5325    | 230  | 537481 RS  | 4.1112     |
| Totals       | 81.5959   |      | 2852430    |            |

Figure S15. Elemental analysis of 3.

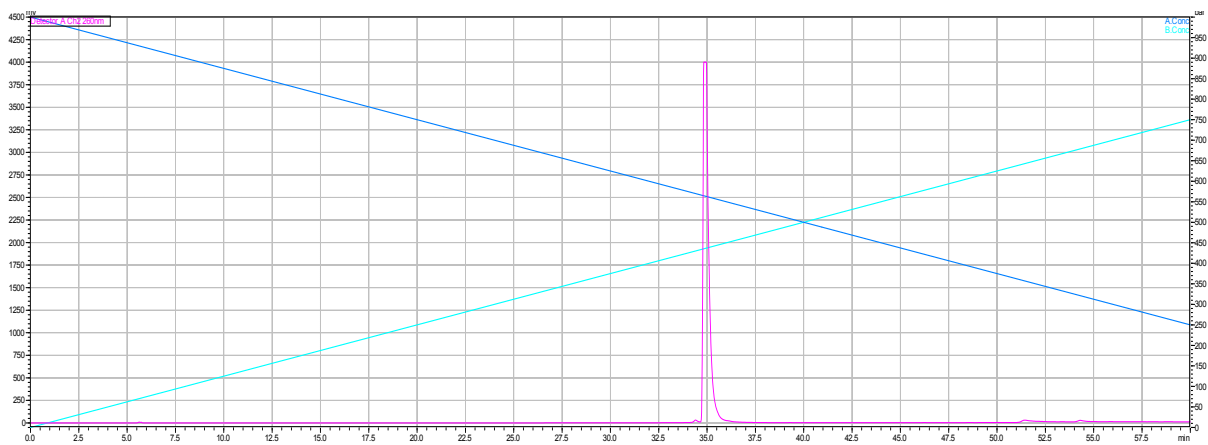

**Figure S16.** HPLC Chromatogram of 4.

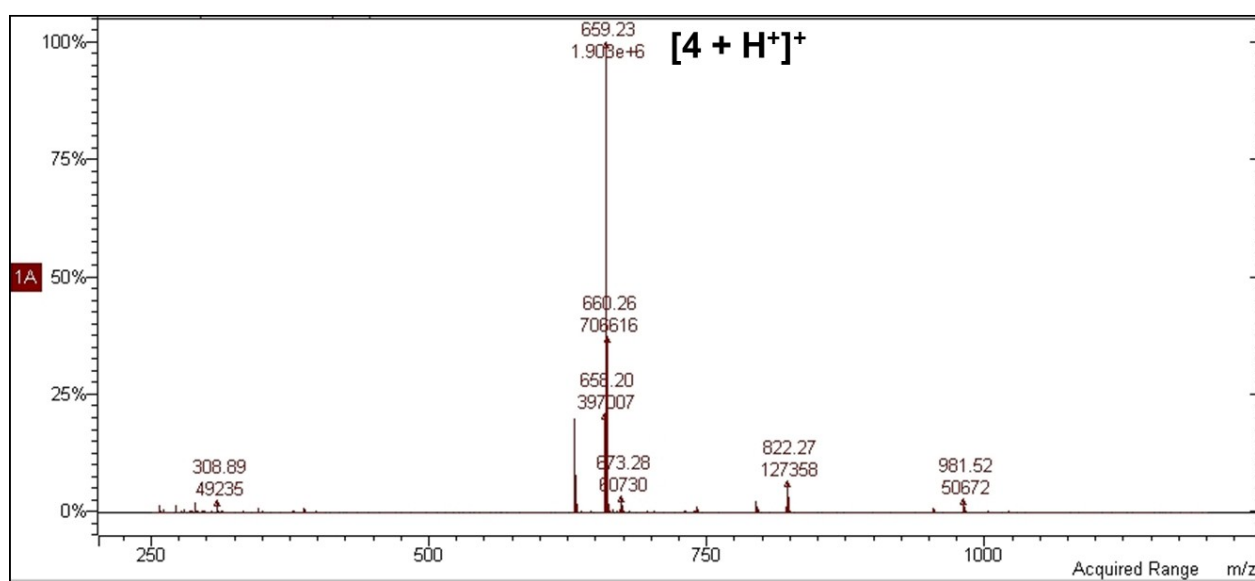

Figure S17. ESI-Mass spectrum of 4.

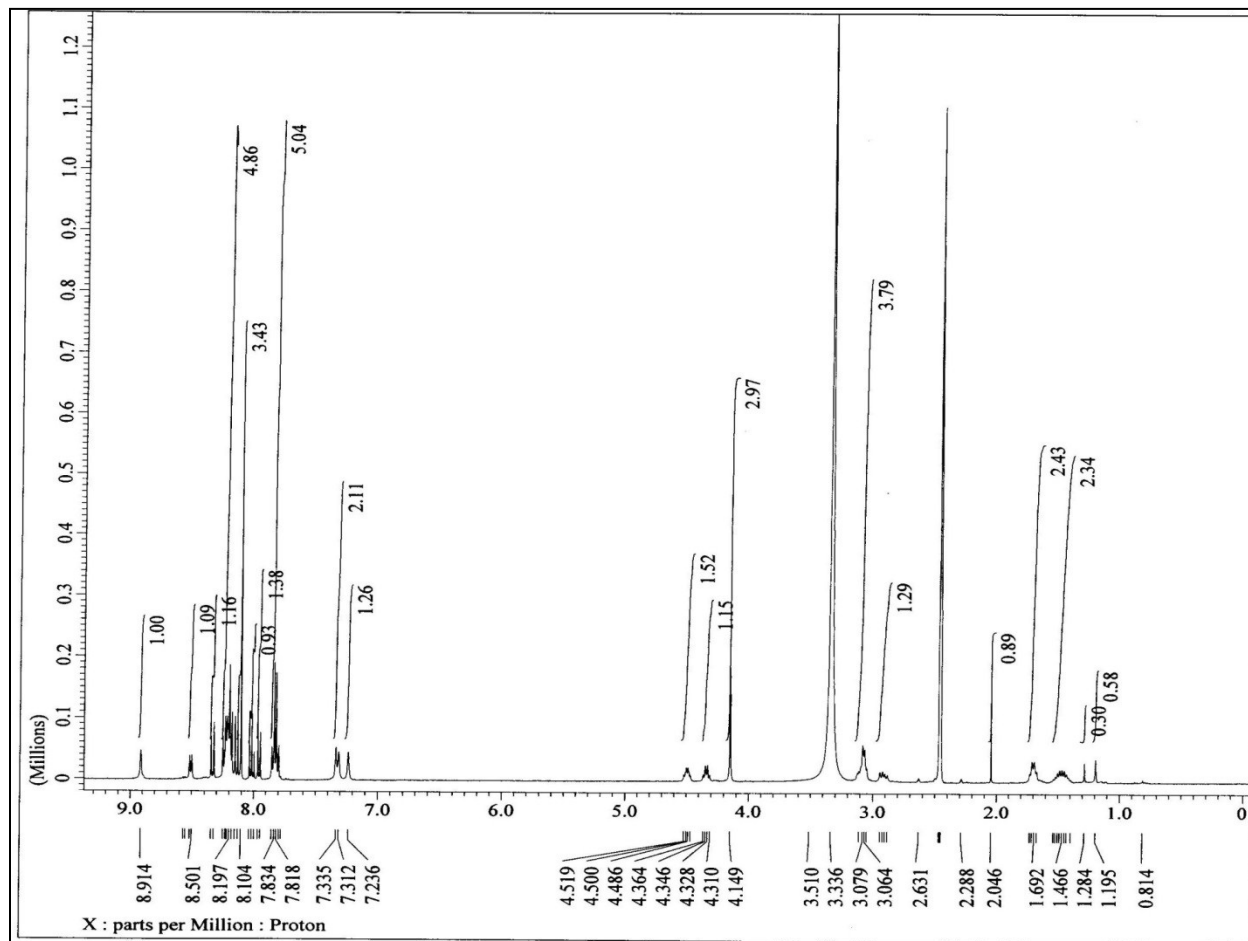

Figure S18.  $^1\text{H}$  NMR of 4.

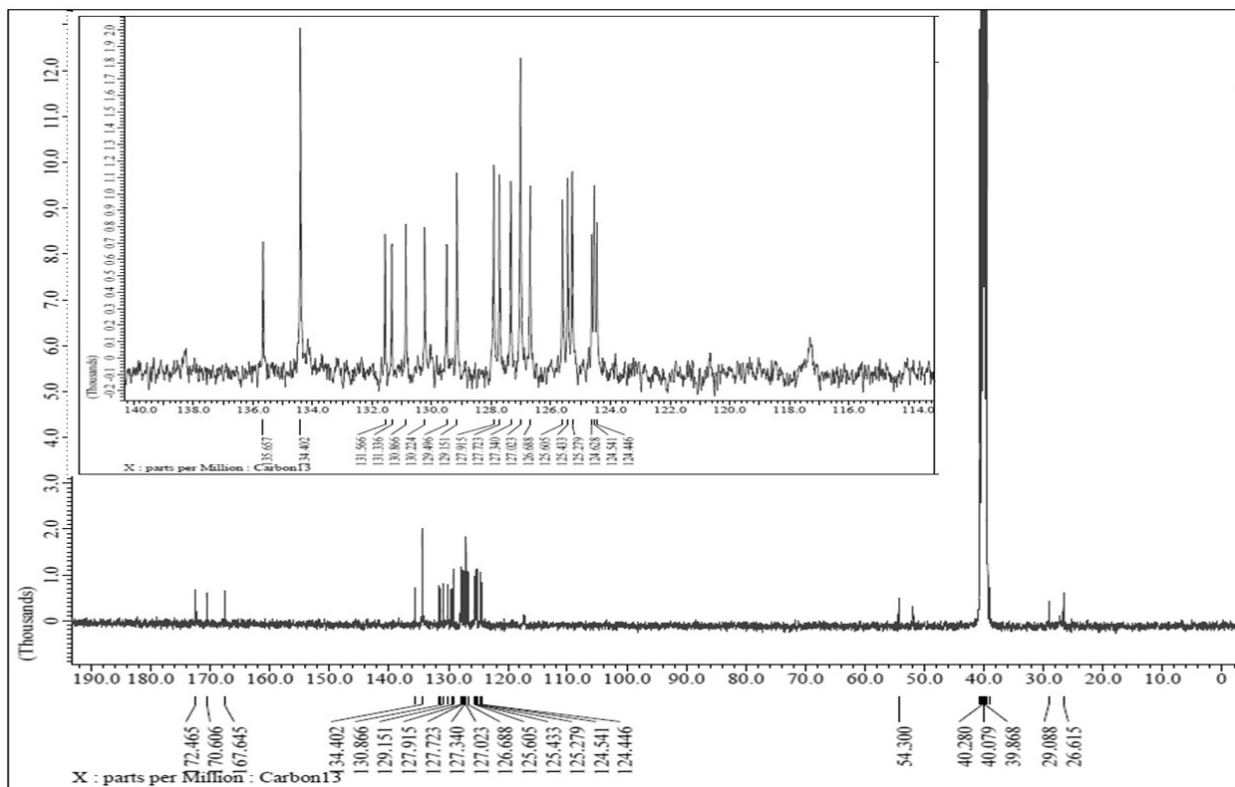

Figure S19. <sup>13</sup>C NMR of 4.

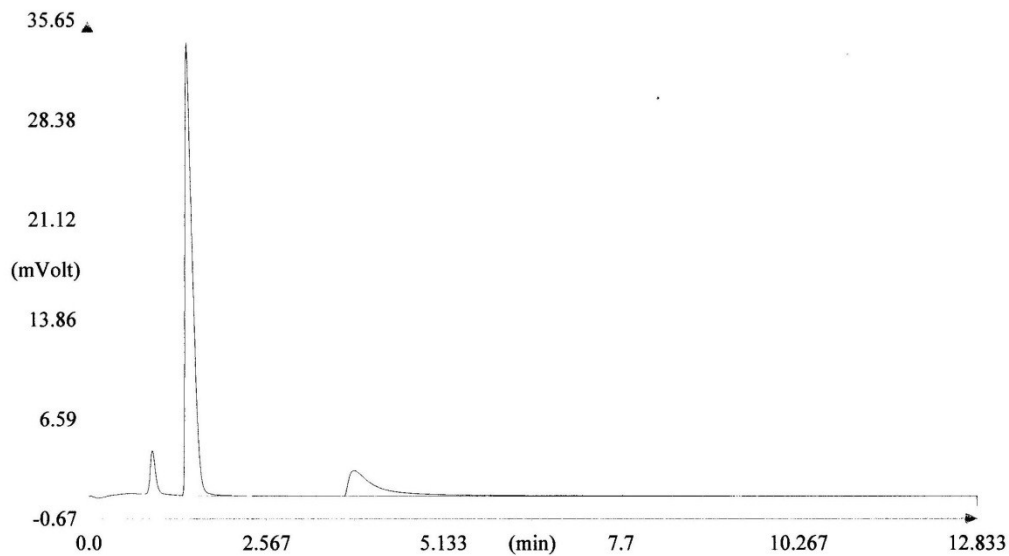

Operator ID:  
 Company name: ThermoFinnigan  
 Method filename: E:\Eager for FLASH\INHA\NCHS\N C H S system 151021.mth  
 Method name: NCHS  
 Analysed: 2015-10-29 15:17  
 Printed: 2015-10-30 13:44  
 Elemental Analyser method:  
 Sampler method:  
 Sample ID: BOPH (# 21)  
 Analysis type: UnkNown  
 Chromatogram filename: Q132.dat  
 Calibration method: K Factors  
 Sample weight: .875  
 Protein factor: 6.25

| Element Name | Ret. Time | Area | BC         | Area rati |
|--------------|-----------|------|------------|-----------|
| Nitrogen     | 10.0026   | 55   | 173351 RS  | 13.8391   |
| Carbon       | 56.2631   | 85   | 2399022 RS | 1.0000    |
| Hydrogen     | 4.5324    | 230  | 579365 RS  | 4.1407    |
| Totals       | 70.7981   |      | 3151738    |           |

Figure S20. Elemental analysis of 4.

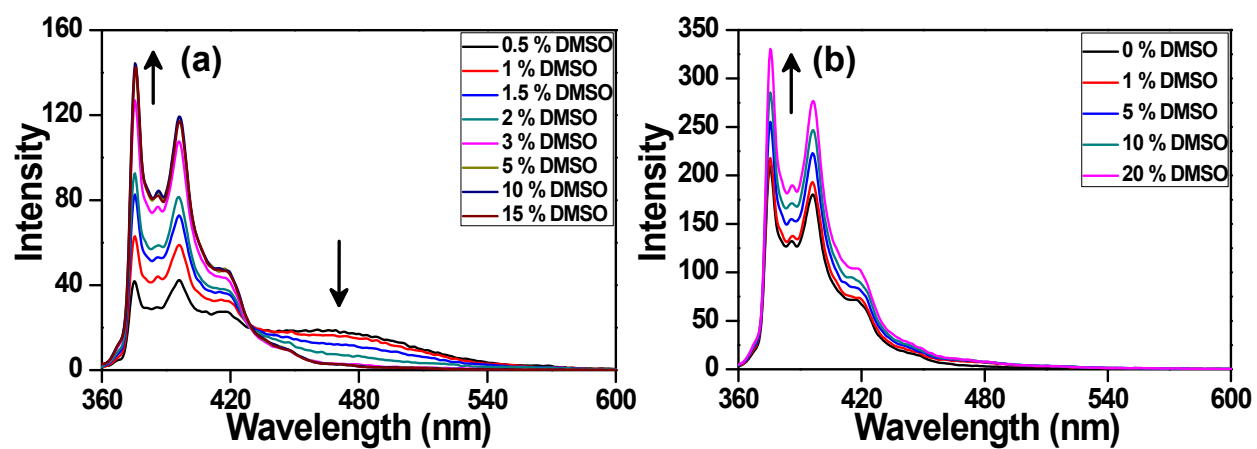

**Figure S21.** Fluorescence spectra of (a) **3** (10  $\mu\text{M}$ ) and (b) **4** (10  $\mu\text{M}$ ) in aqueous buffered solution (50 mM phosphate, pH 7.4) containing different percentage of DMSO ( $\lambda_{\text{ex}} = 342$  nm, slit = 12/2.5 nm).



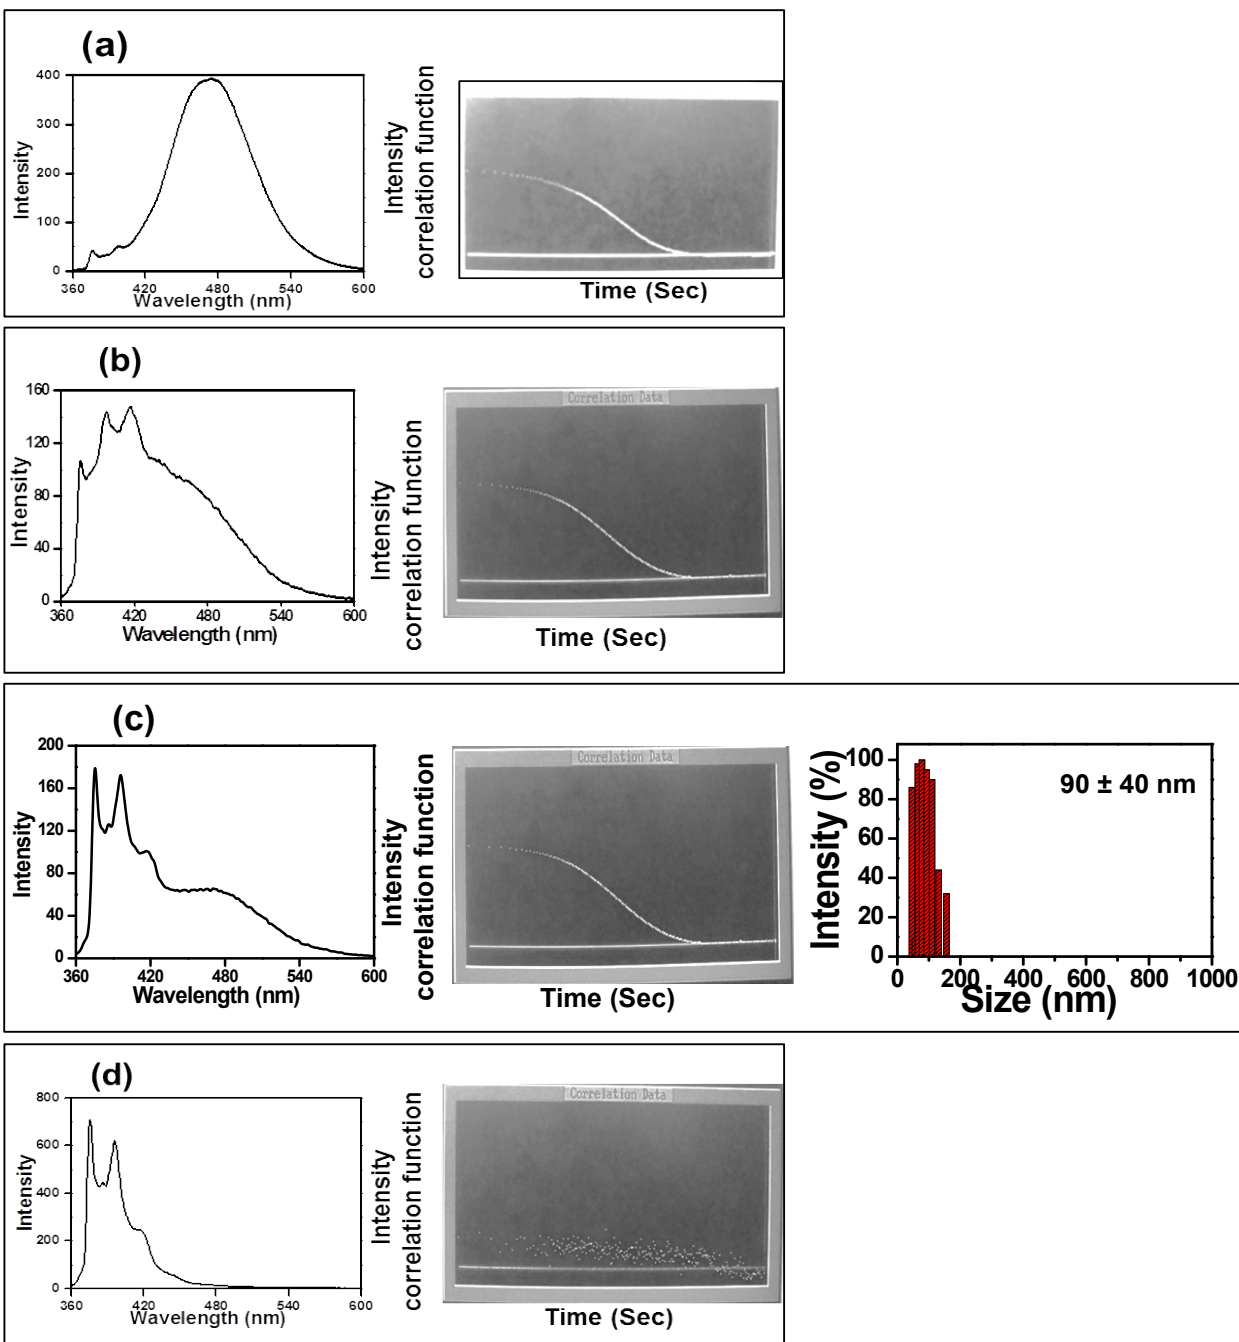

**Figure S22.** Fluorescence emission spectra and intensity correlation function of (a) **1** (b) **2** (c) **3**, and (d) **4** for particle size analysis in phosphate buffer solutions containing DMSO (3 %, 10 %, 3 %, and 0 %, respectively) at pH 7.4. The concentration of each compound is 30  $\mu\text{M}$ .

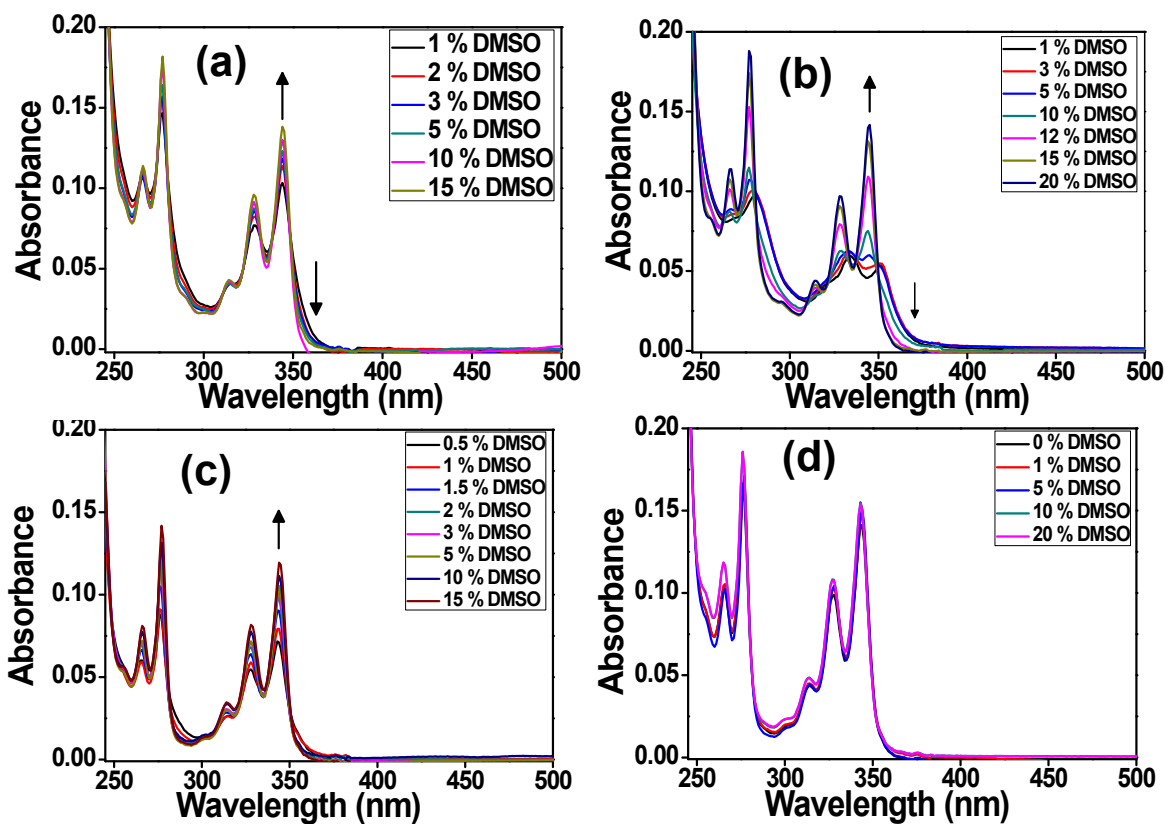

**Figure S23.** UV-visible absorption spectra of (a) **1** (b) **2** (c) **3**, and (d) **4** in aqueous buffered solutions (50 mM phosphate, pH 7.4) containing different percentage of DMSO. The concentration of each compound is 10  $\mu$ M.

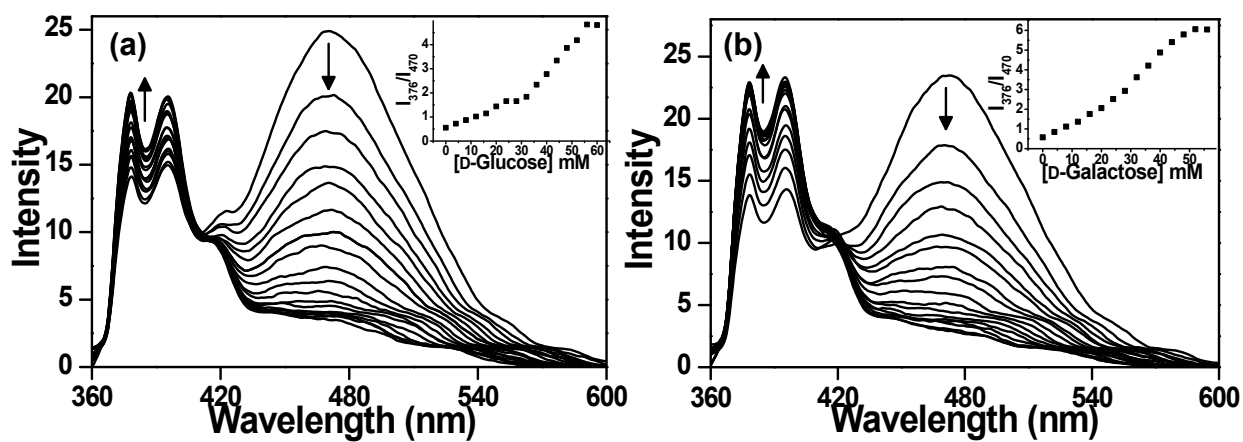

**Figure S24.** Fluorescence spectra of **1** (10  $\mu\text{M}$ ) upon the gradual addition of (a) D-glucose and (b) D-galactose in aqueous buffered solutions ( $\text{H}_2\text{O}$ –DMSO, 99:1, v/v, 50 mM phosphate at pH 7.4),  $\lambda_{\text{ex}} = 342$  nm, slit = 12/2.5 nm.

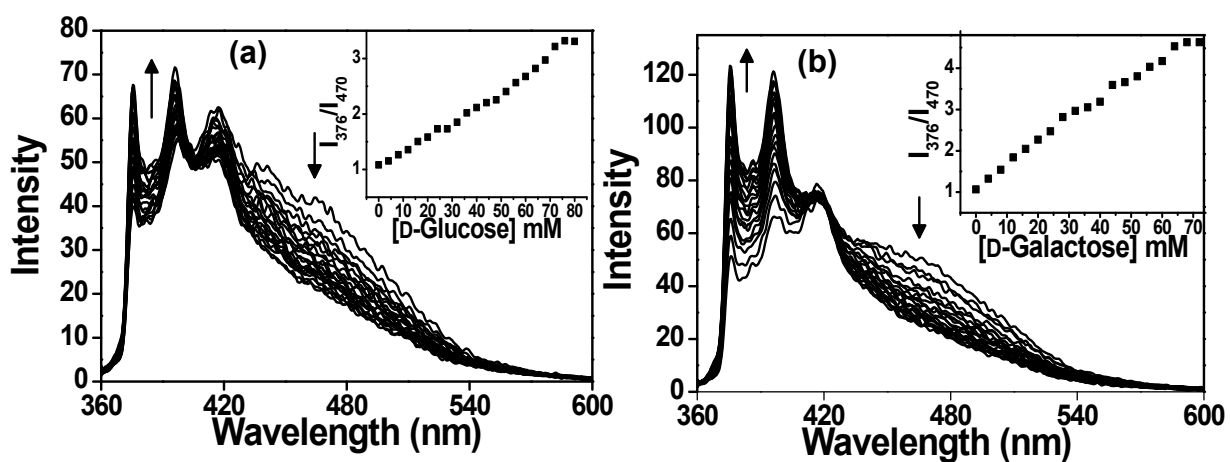

**Figure S25.** Fluorescence spectra of **2** (10  $\mu$ M) upon the gradual addition of (a) D-glucose mM) and (b) D-galactose in aqueous buffered solutions ( $\text{H}_2\text{O}$ –DMSO, 95:5, v/v, 50 mM phosphate at pH 7.4),  $\lambda_{\text{ex}} = 342$  nm, slit = 12/2.5 nm.

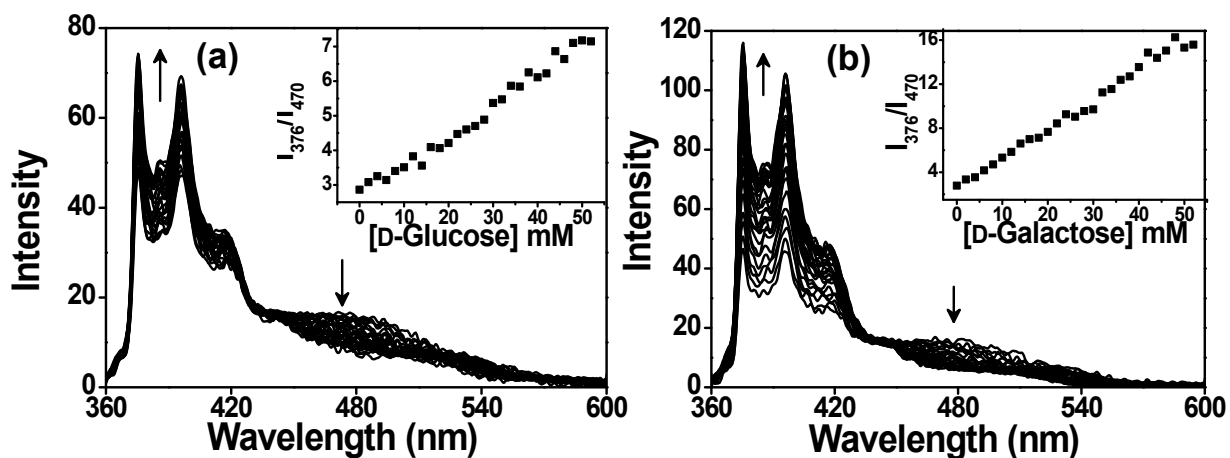

**Figure S26.** Fluorescence spectra of **3** (10  $\mu$ M) upon the gradual addition of (a) D-glucose mM) and (b) D-galactose in aqueous buffered solutions ( $\text{H}_2\text{O}$ –DMSO, 99.5:0.5, v/v, 50 mM phosphate at pH 7.4),  $\lambda_{\text{ex}} = 342$  nm, slit = 12/2.5 nm.

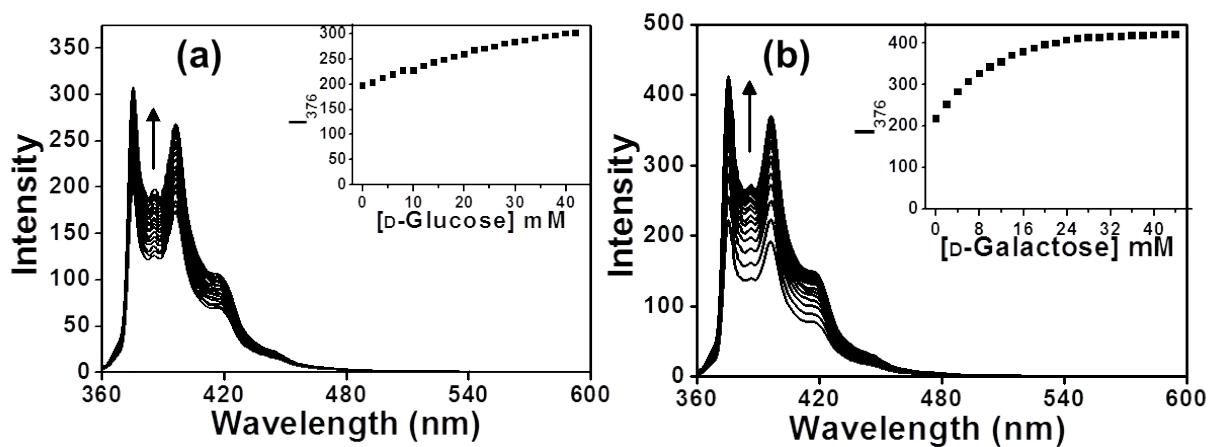

**Figure S27.** Fluorescence spectra of **4** (10  $\mu$ M) upon the gradual addition of (a) D-glucose mM) and (b) D-galactose in aqueous buffered solutions (50 mM phosphate, pH 7.4),  $\lambda_{\text{ex}} = 342$  nm, slit = 12/2.5 nm.

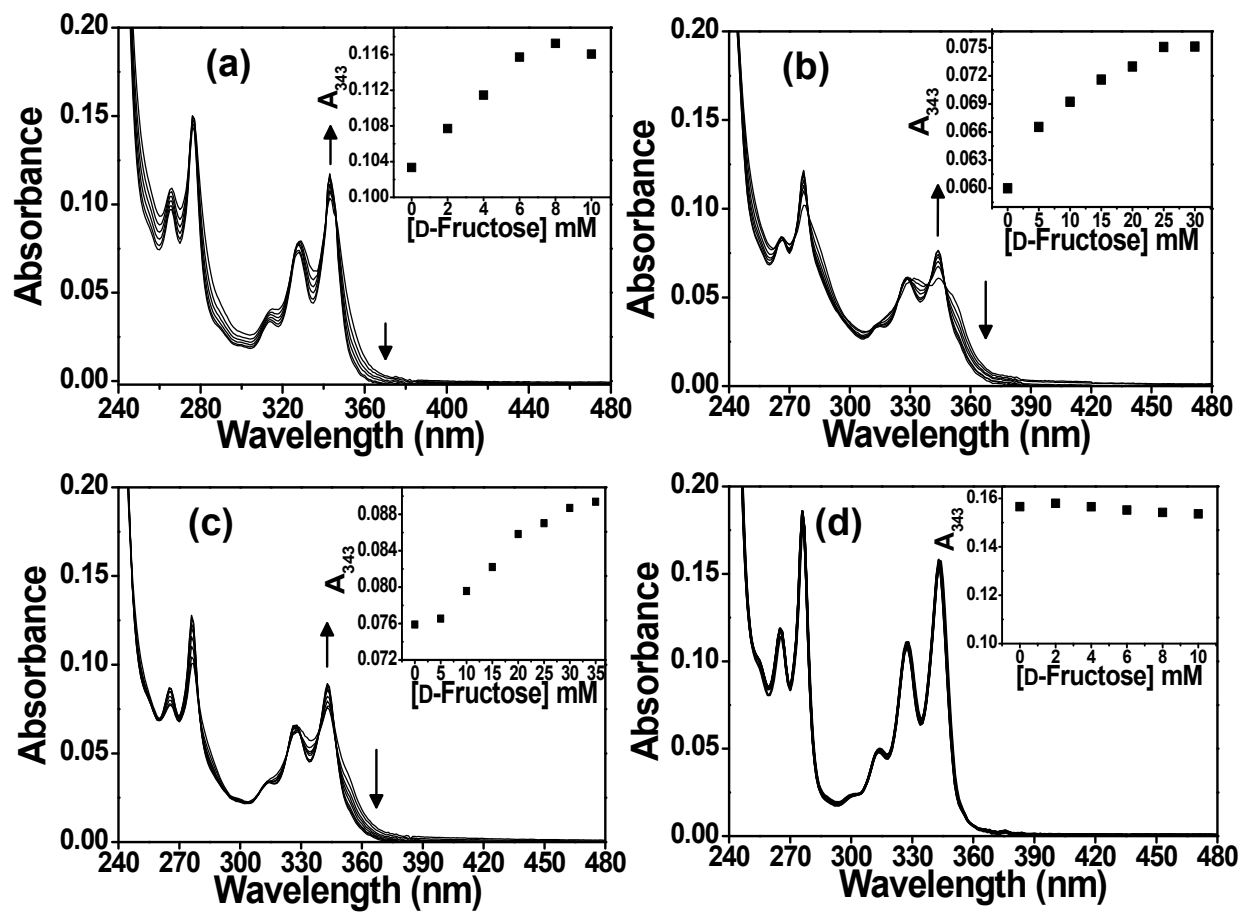

**Figure S28.** UV-visible absorption spectra of (a) 1 (b) 2 (c) 3 and (d) 4 upon the gradual addition of D-fructose in aqueous buffered solutions containing 1%, 5 %, 0.5 % and 0 % DMSO, respectively. The concentration of each compound is 10  $\mu$ M.

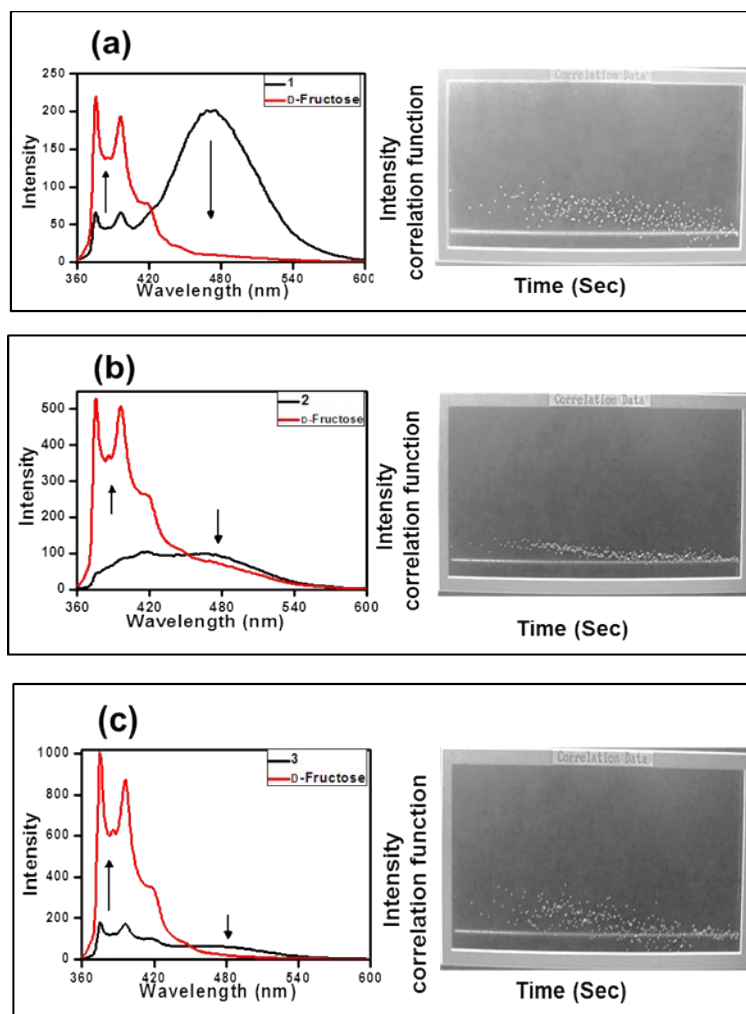

**Figure S29.** Fluorescence emission spectra and intensity correlation function of (a) **1** (b) **2**, and (c) **3** in the presence of D-fructose (60 mM) for particle size analysis in phosphate buffer solution containing DMSO (3 %, 10 %, and 3 %, respectively) at pH 7.4. The concentration of each compound is 30  $\mu$ M.



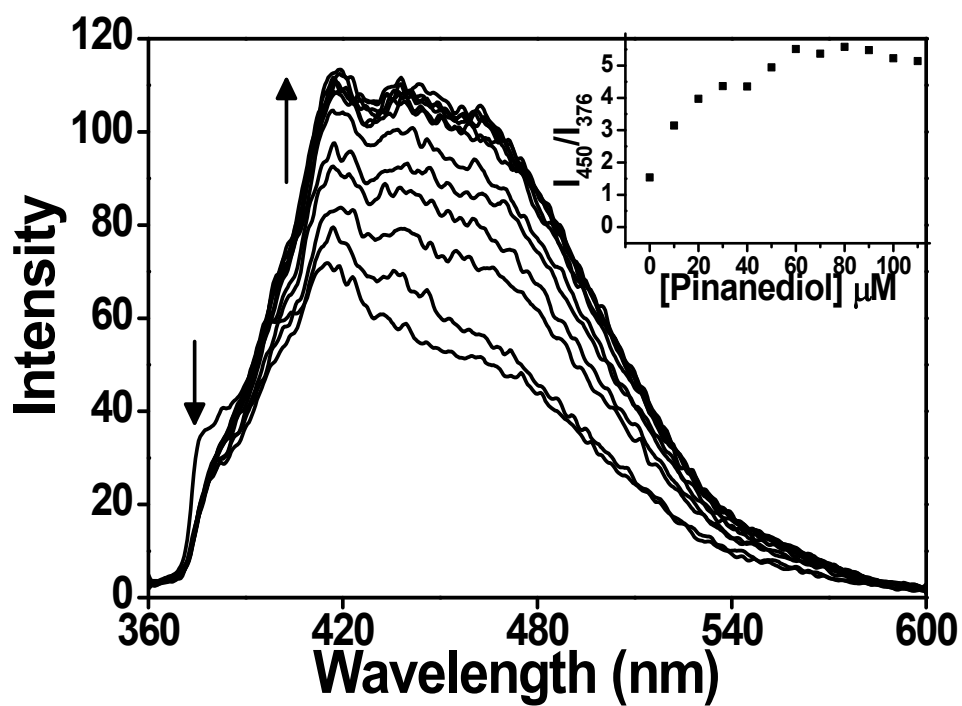

**Figure S30.** Fluorescence spectra of **2** (10 μM) upon the gradual addition of pinanediol in aqueous buffered solutions (50 mM phosphate buffer, pH 7.4) containing 5 % DMSO ( $\lambda_{\text{ex}} = 342$  nm, slit = 12/2.5 nm).

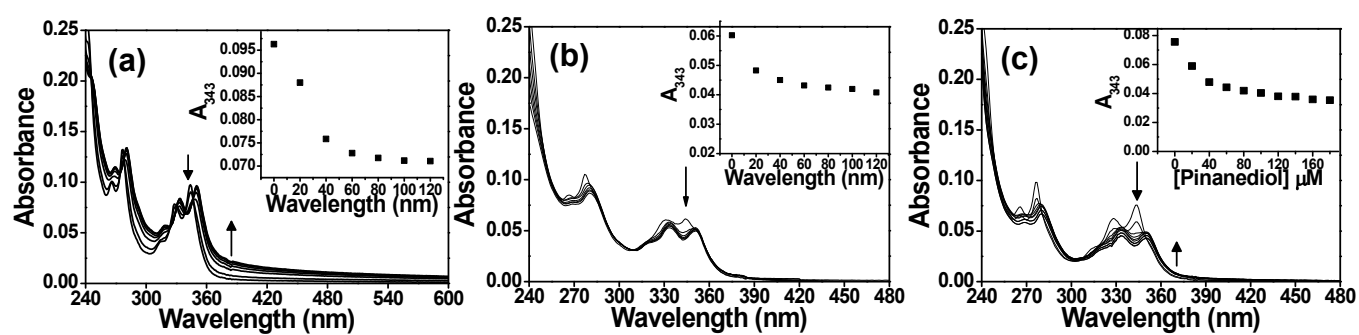

**Figure S31.** UV-visible absorption spectra of (a) **1** (b) **2** and (c) **3** upon the addition of pinanediol in aqueous buffered solutions (50 mM phosphate, pH 7.4) containing DMSO (1 %, 5% and 0.5 %, respectively). The concentration of each compound is 10  $\mu\text{M}$ .

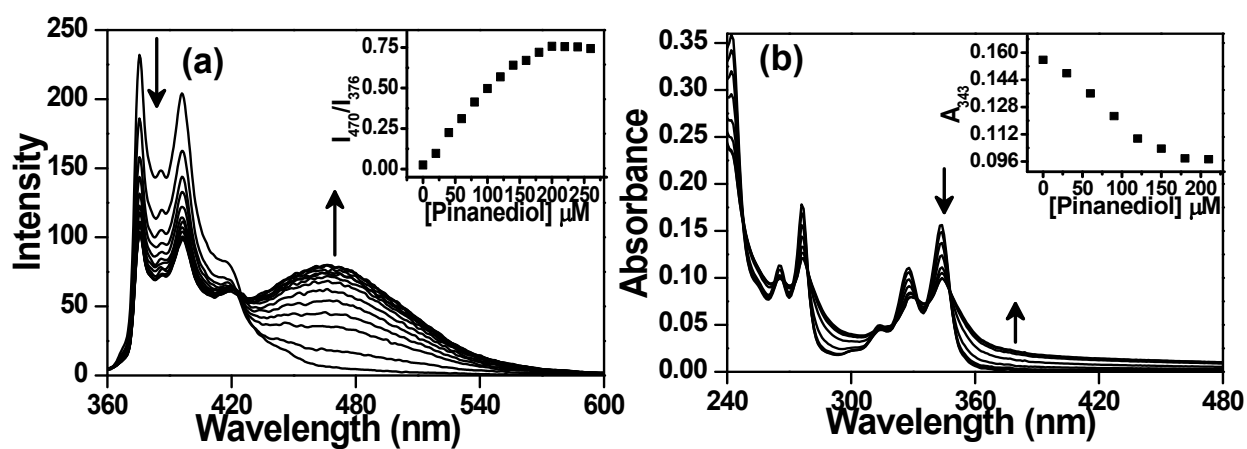

**Figure S32.** (a) Fluorescence spectra of **4** (10  $\mu\text{M}$ ) upon the gradual addition of pinanediol ( $\lambda_{\text{ex}} = 342$  nm, slit = 12/2.5 nm). (b) UV-visible absorption spectra of **4** (10  $\mu\text{M}$ ) upon the gradual addition of pinanediol in aqueous buffered solutions (50 mM phosphate, pH 7.4).

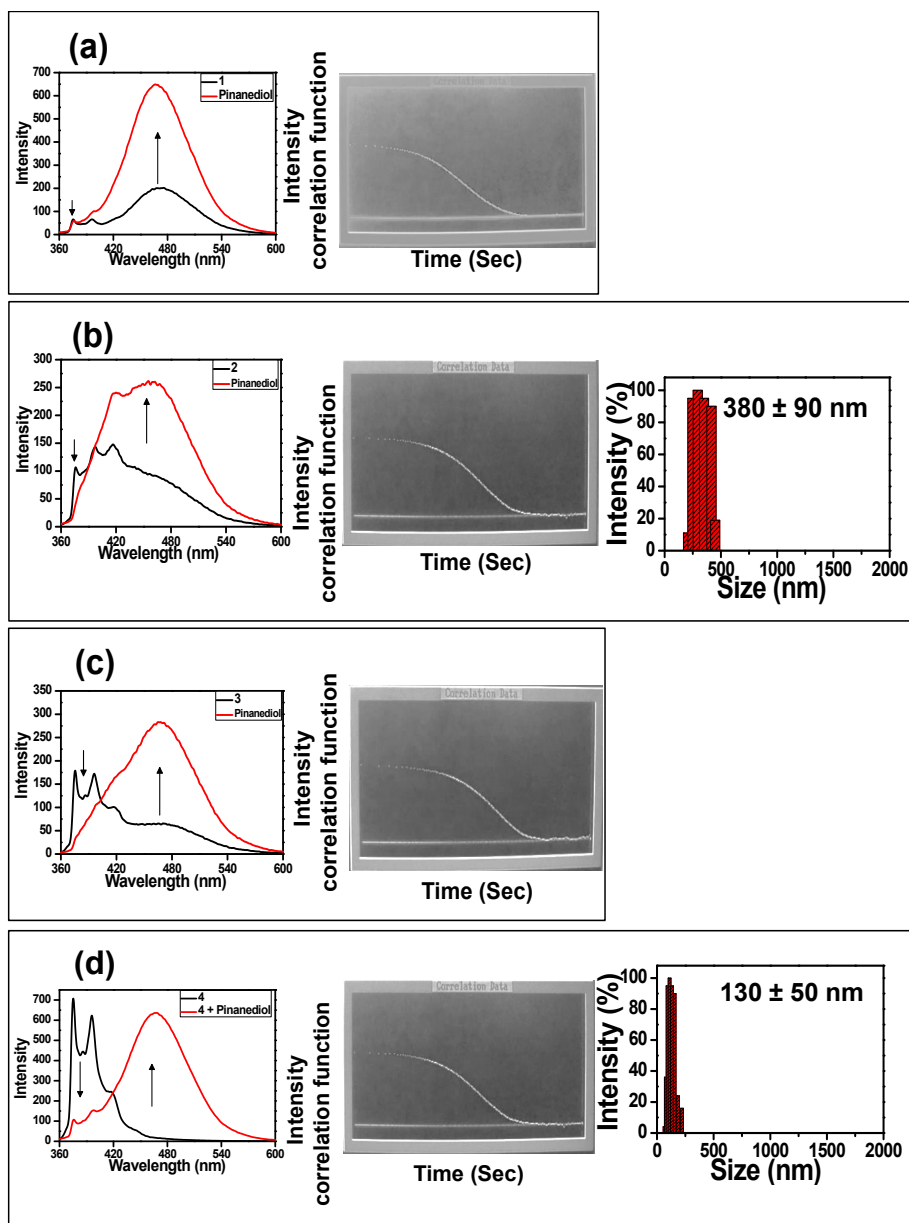

**Figure S33.** Fluorescence emission spectra and intensity correlation function of (a) **1** (b) **2** (c) **3**, and (d) **4** in the presence of pinanediol (0.2 mM) for particle size analysis in phosphate buffer solution containing DMSO (3 %, 10%, 3 % and 0 %, respectively) at pH 7.4. The concentration of each compound is 30  $\mu$ M.

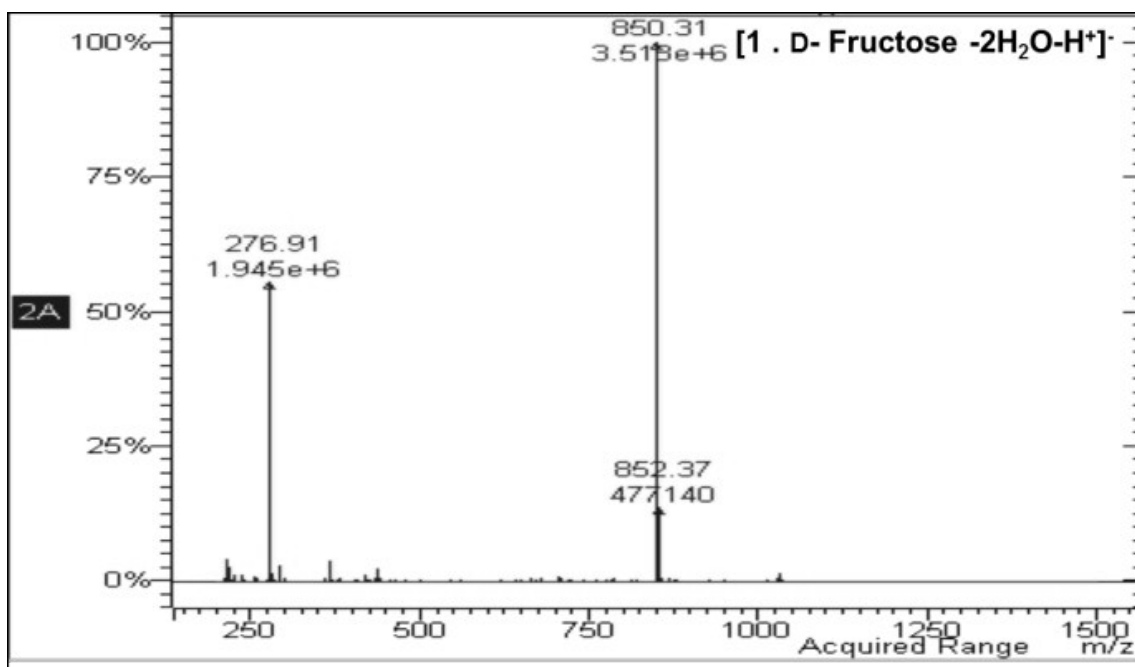

**Figure S34.** ESI-mass spectrum of **1** in the presence of D-fructose.

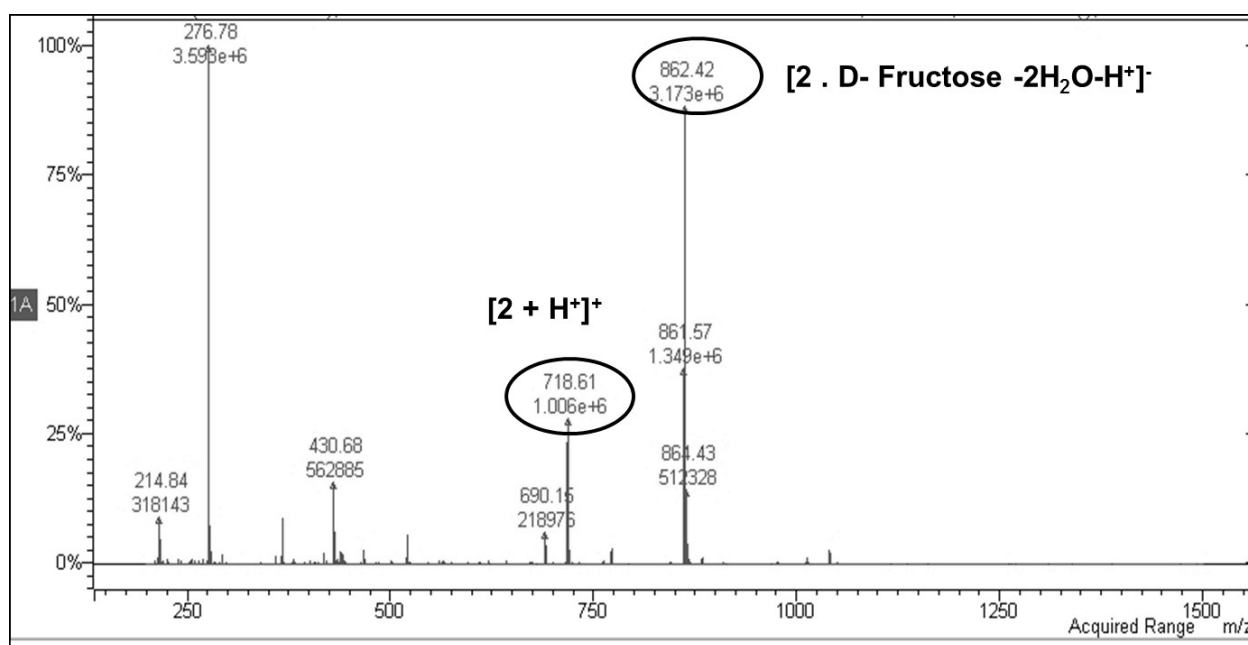

**Figure S35.** ESI mass spectrum of **2** in the presence of D-fructose.

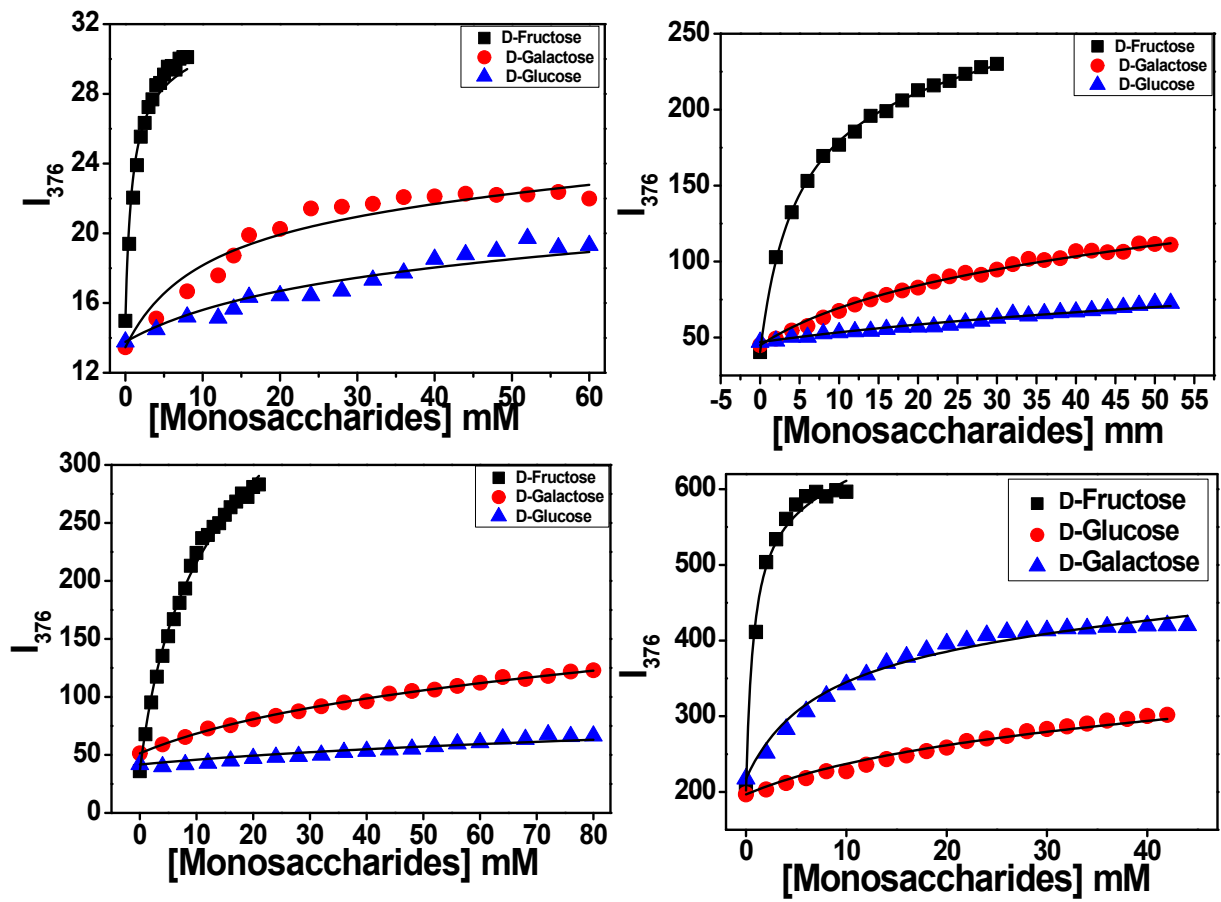

Figure S36. Fitting curve of (a) 1 (b) 2 (c) 3, and (d) 4 in the presence of monosaccharides.

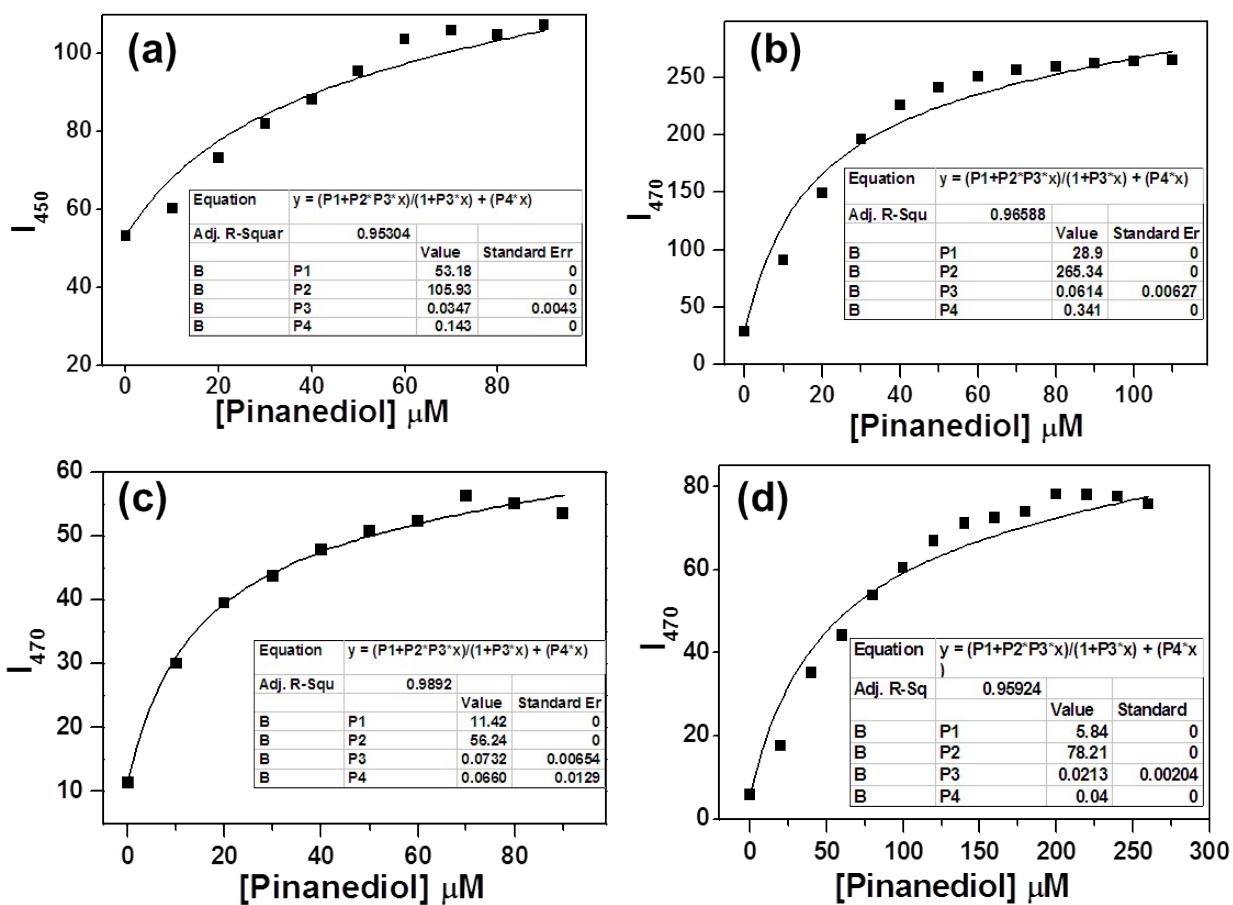

**Figure S37.** Fitting curve of (a) **1** (b) **2** (c) **3**, and (d) **4** in the presence of pinanediol.



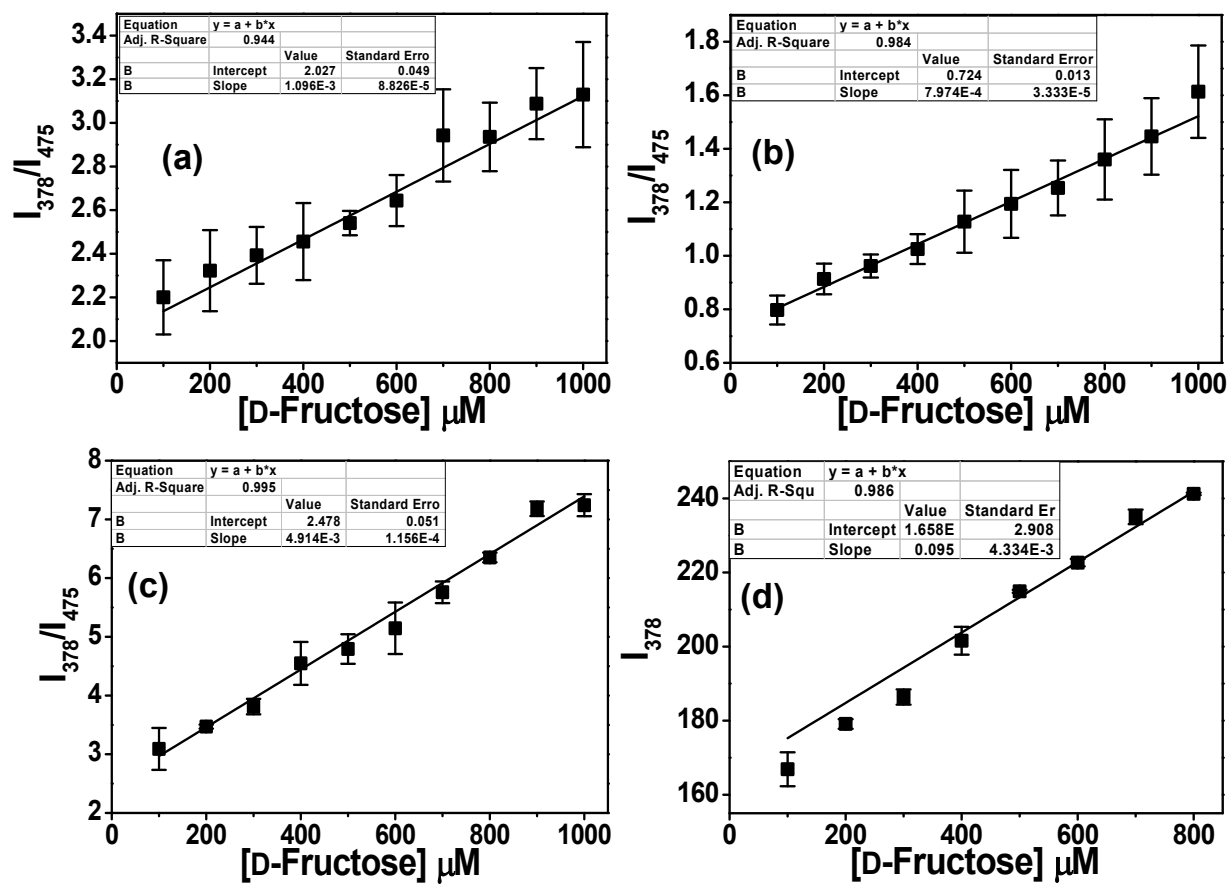

**Figure S38.** The emission intensity ratio ( $I_{378}/I_{475}$ ) of (a) 1 (b) 2 (c) 3, and (d) 4 with increasing concentration of D-fructose in aqueous buffered solution. The concentration of peptides is 10  $\mu\text{M}$ .
